# Supplementary material for: Synthesis and intramolecular ring transformation of N,N′-dialkylated 2,6,9-triazabicyclo[3.3.1]nonadienes
Source: Royal Society of Chemistry journal article supplement (doi:10.1039/d0ob01950j), 2020-01-01

## Electronic supporting information

### Synthesis and intramolecular ring transformation of *N,N'*-dialkylated 2,6,9-triazabicyclo[3.3.1]nonadienes

Yumi Nakaike,<sup>a</sup> Yusuke Yoshida,<sup>b</sup> Soichi Yokoyama,<sup>b,c,d</sup> Akitaka Ito<sup>b,c</sup> and Nagatoshi Nishiwaki<sup>\*b,c</sup>

- a) Department of Energy and Hydrocarbon Chemistry, Graduate School of Engineering, Kyoto University, Yoshidahonmachi, Sakyo-ku, Kyoto 606-8501, Japan
- b) School of Environmental Science and Engineering, Kochi University of Technology, Tosayamada, Kami, Kochi 782-8502, Japan
- c) Research Center for Molecular Design, Kochi University of Technology, Tosayamada, Kami, Kochi 782-8502, Japan
- d) The Institute of Scientific and Industrial Research, Osaka University, Mihogaoka, Ibaraki, Osaka 567-0047, Japan

Email: nishiwaki.nagatoshi@kochi-tech.ac.jp  
Fax: +81 887 57 2520; Tel: +81 887 57 2517

## Table of contents

|                                                     |            |
|-----------------------------------------------------|------------|
| <b>1. X-Ray crystallographic analysis</b> .....     | <b>S2</b>  |
| <b>2. Temperature dependening NMR spectra</b> ..... | <b>S3</b>  |
| <b>3. Copies of NMR spectra</b> .....               | <b>S12</b> |

## 1. Crystallographic data for 2a and 3d

**Table S1.** Crystallographic data for **2a** and **3d**.

|                                                                 | <b>2a</b>                                                     | <b>3d</b>                                                     |
|-----------------------------------------------------------------|---------------------------------------------------------------|---------------------------------------------------------------|
| Empirical formula                                               | C <sub>12</sub> H <sub>19</sub> N <sub>5</sub> O <sub>4</sub> | C <sub>20</sub> H <sub>19</sub> N <sub>5</sub> O <sub>4</sub> |
| Formula weight                                                  | 297.32                                                        | 393.40                                                        |
| Crystal system                                                  | monoclinic                                                    | monoclinic                                                    |
| Space group                                                     | <i>P2<sub>1</sub>/c</i>                                       | <i>P2<sub>1</sub>/n</i>                                       |
| <i>a</i> / Å                                                    | 17.8252(6)                                                    | 14.4032(16)                                                   |
| <i>b</i> / Å                                                    | 7.4804(2)                                                     | 9.8582(2)                                                     |
| <i>c</i> / Å                                                    | 10.9523(4)                                                    | 19.916(2)                                                     |
| <i>α</i> / °                                                    | 90                                                            | 90                                                            |
| <i>β</i> / °                                                    | 105.159(4)                                                    | 140.02(2)                                                     |
| <i>γ</i> / °                                                    | 90                                                            | 90                                                            |
| Volume / Å <sup>3</sup>                                         | 1409.56(8)                                                    | 1817.0(6)                                                     |
| <i>Z</i>                                                        | 4                                                             | 4                                                             |
| $\rho_{\text{calc}}$ / g cm <sup>-3</sup>                       | 1.401                                                         | 1.438                                                         |
| $\mu(\text{Mo K}\alpha)$ / mm <sup>-1</sup>                     | 0.107                                                         | 0.103                                                         |
| <i>F</i> (000)                                                  | 632                                                           | 824                                                           |
| Crystal size / mm <sup>3</sup>                                  | 0.294 × 0.082 × 0.033                                         | 0.796 × 0.532 × 0.413                                         |
| 2 $\theta$ range / °                                            | 4.736 to 52.74                                                | 5.01 to 52.744                                                |
| Temperature / K                                                 | 123.15                                                        | 93.15                                                         |
| Reflections collected                                           | 10670                                                         | 13775                                                         |
| Independent reflections                                         | 2885                                                          | 3711                                                          |
| Goodness-of-fit on <i>F</i> <sup>2</sup>                        | 1.053                                                         | 1.057                                                         |
| <i>R</i> <sub>1</sub> ( <i>I</i> ≥ 2σ( <i>I</i> )) <sup>a</sup> | 0.0343                                                        | 0.0351                                                        |
| w <i>R</i> <sub>2</sub> (all data) <sup>b</sup>                 | 0.0871                                                        | 0.0892                                                        |

<sup>a</sup>  $R_1 = \Sigma||F_o| - |F_c||/\Sigma|F_o|$ . <sup>b</sup>  $wR_2 = \{\Sigma[w(F_o^2 - F_c^2)^2]/\Sigma[w(F_o^2)^2]\}^{1/2}$ .

## 2. Temperature depending NMR spectra

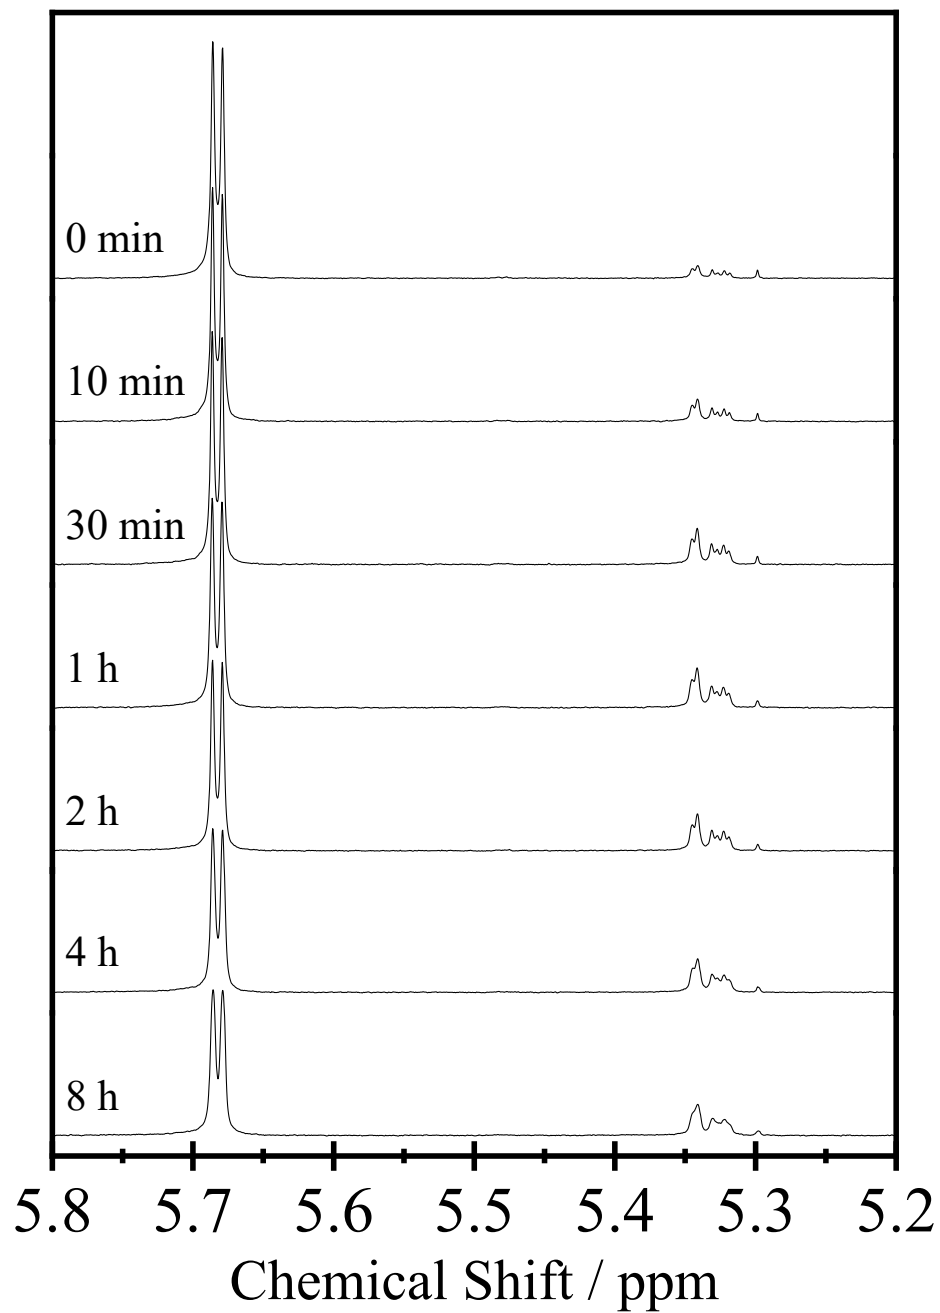

**Figure S1.** Time variation in  $^1\text{H}$  NMR spectrum of **2a** in  $\text{CDCl}_3$ .

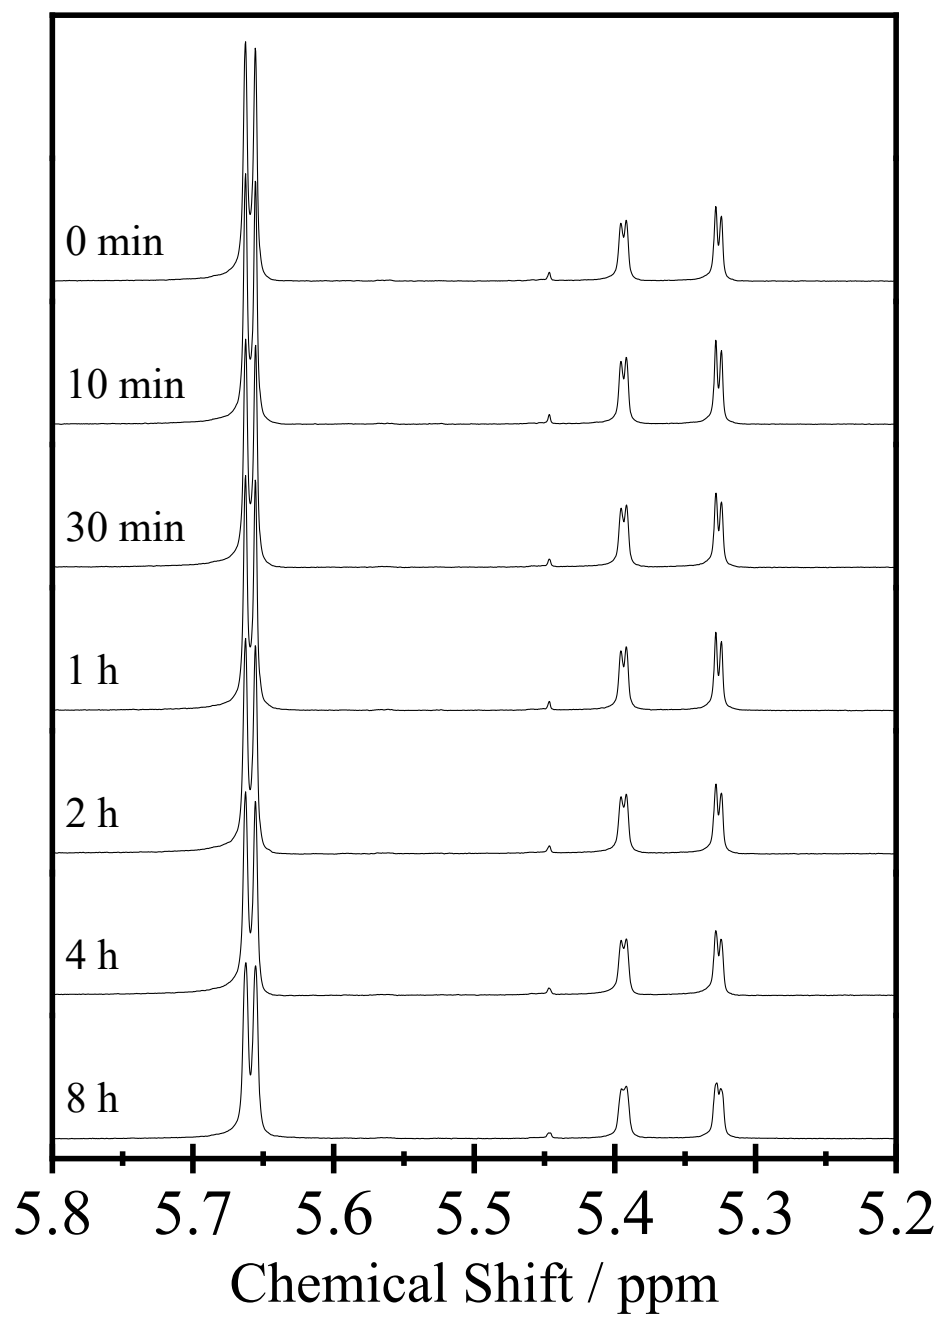

**Figure S2.** Time variation in  $^1\text{H}$  NMR spectrum of **2a** in  $\text{CD}_3\text{CN}$ .

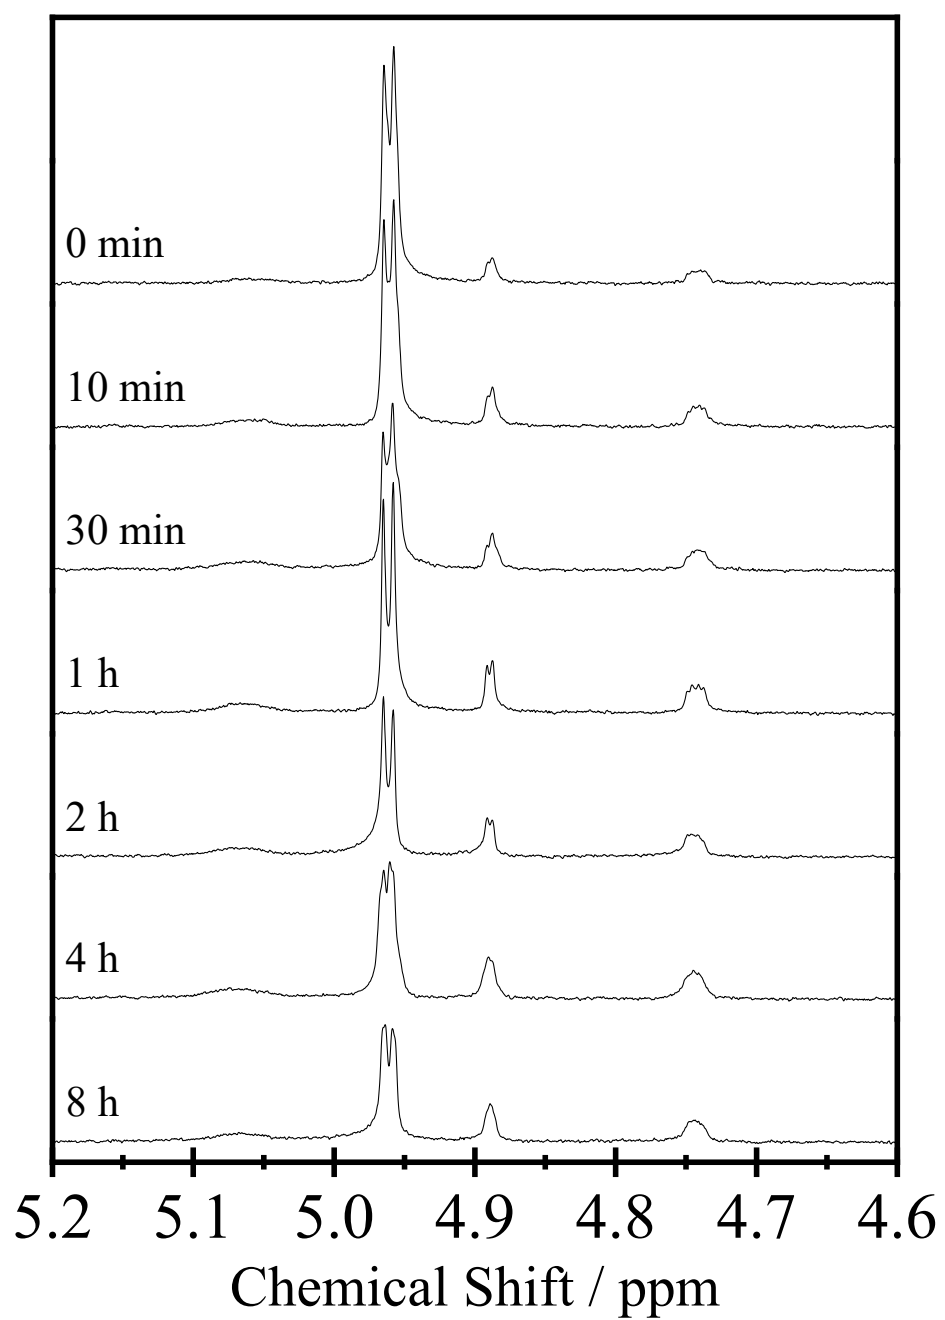

**Figure S3.** Time variation in  $^1\text{H}$  NMR spectrum of **2a** in  $\text{C}_6\text{D}_6$ .

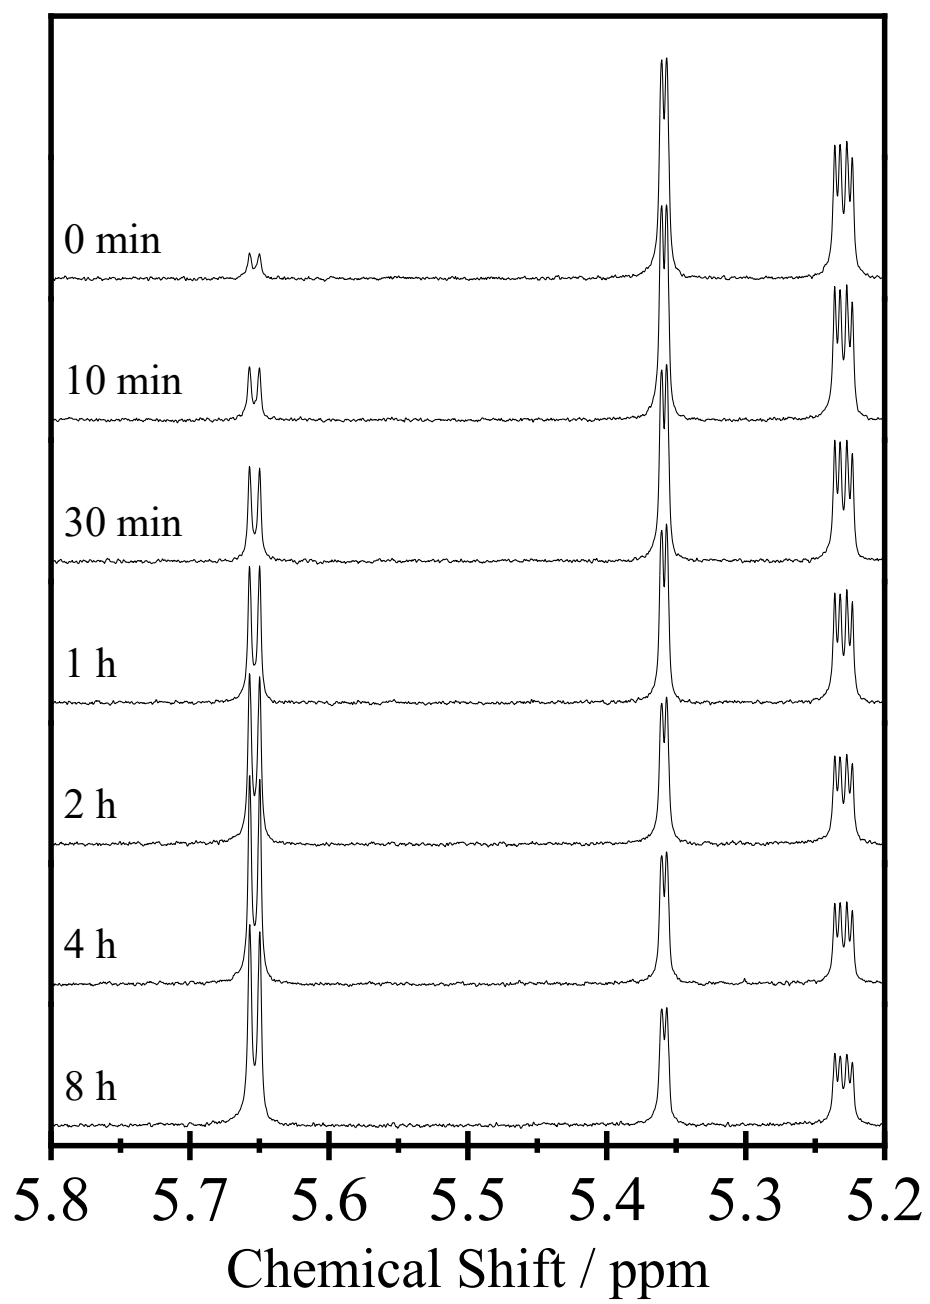

**Figure S4.** Time variation in  $^1\text{H}$  NMR spectrum of **3d** in  $\text{CDCl}_3$ .

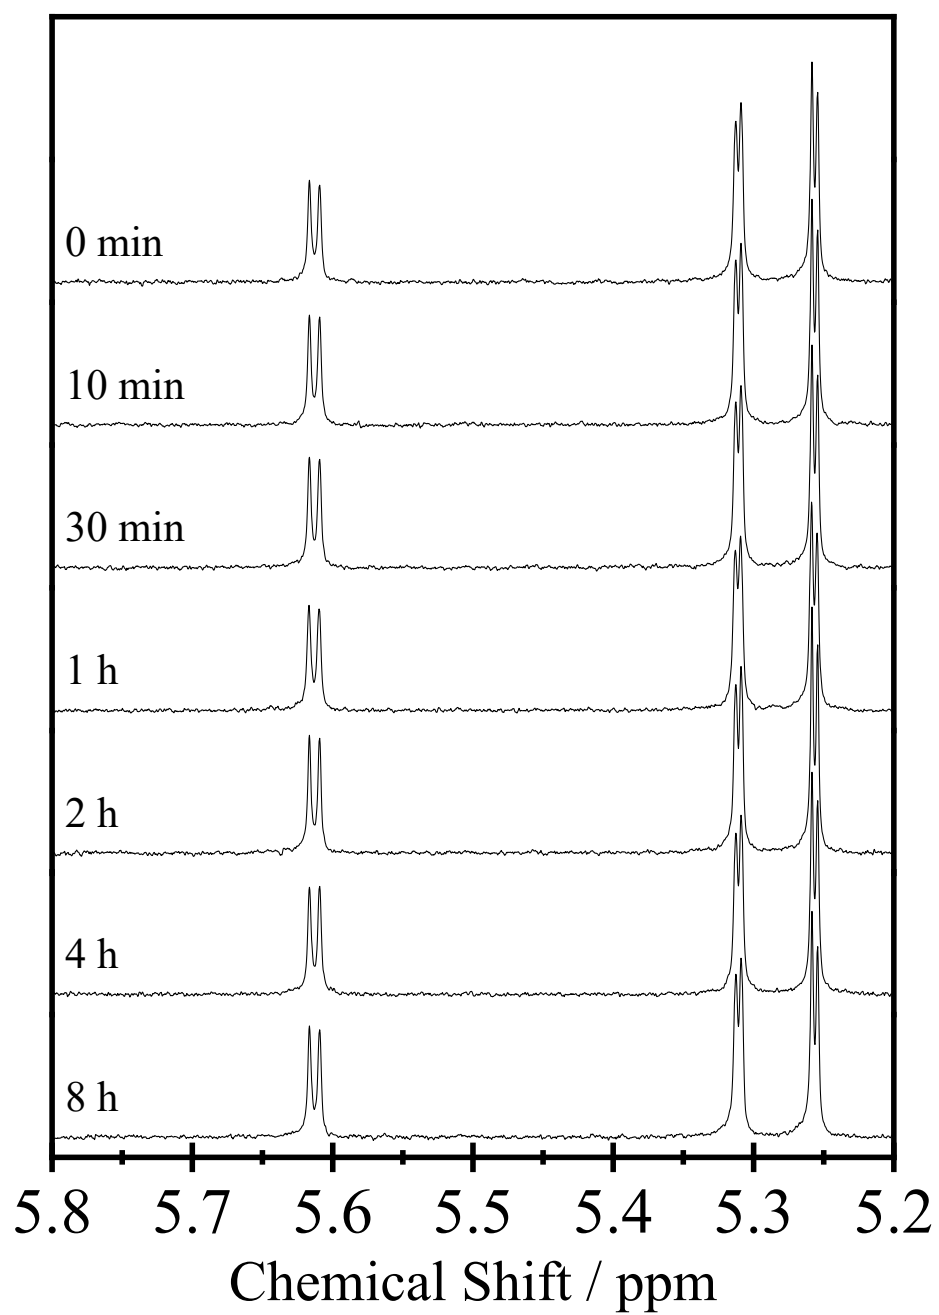

**Figure S5.** Time variation in  $^1\text{H}$  NMR spectrum of **3d** in  $\text{CD}_3\text{CN}$ .

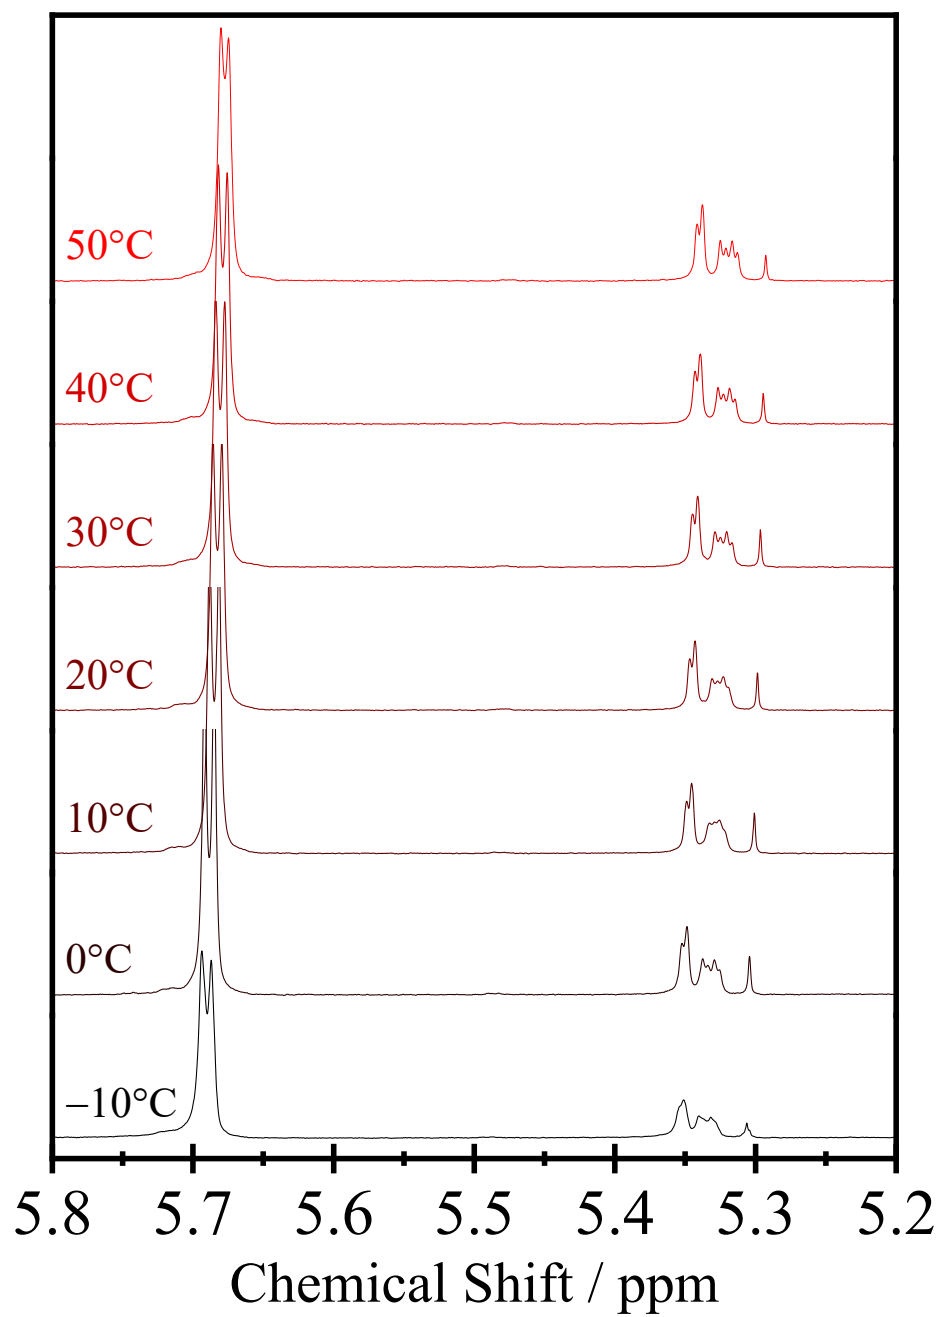

**Figure S6.** Temperature depending  $^1\text{H}$  NMR spectrum of **3a/2a** in  $\text{CDCl}_3$ .



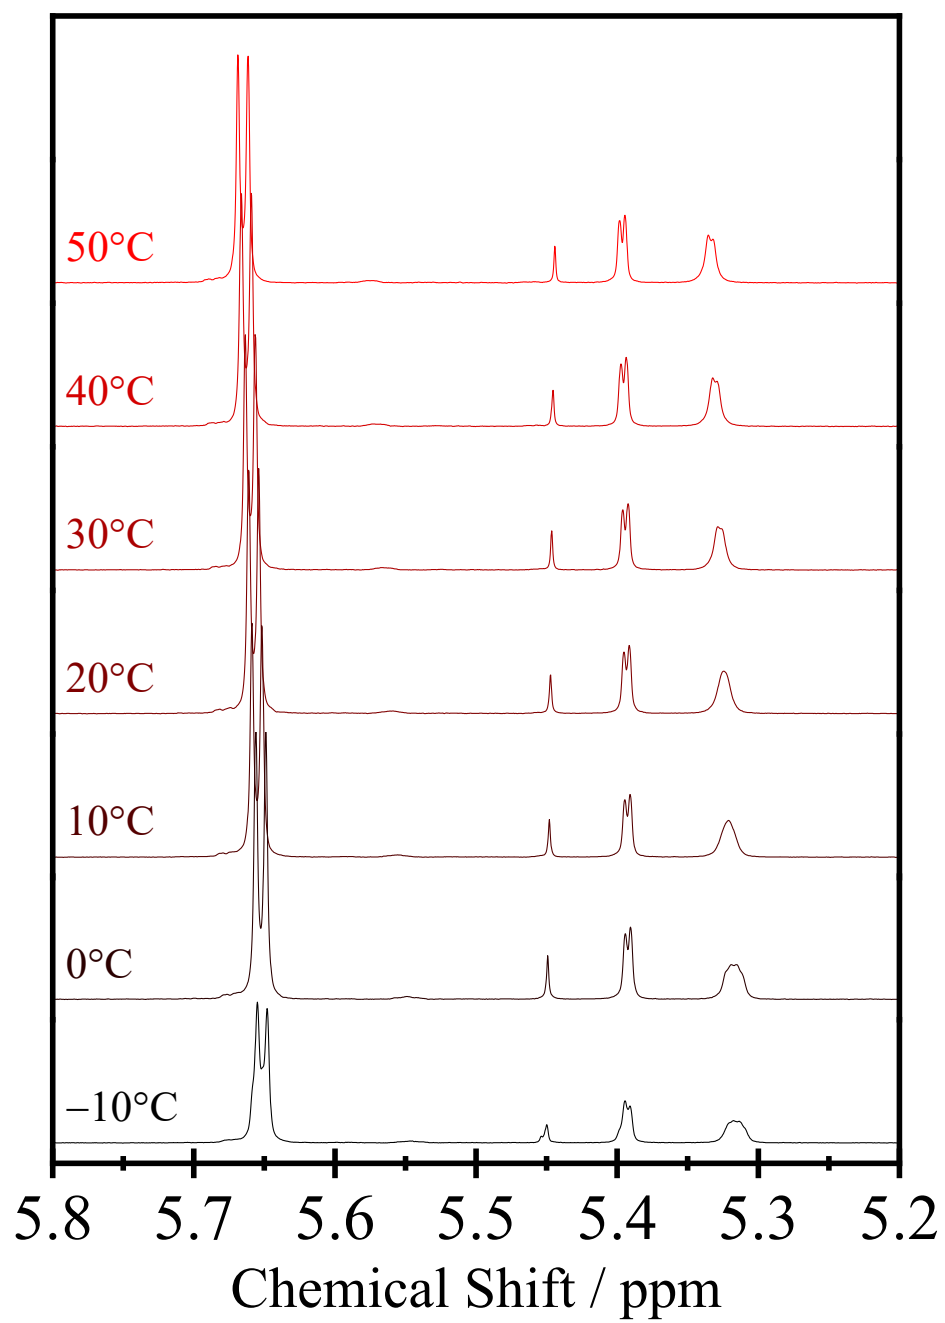

**Figure S7.** Temperature depending <sup>1</sup>H NMR spectrum of **3a/2a** in CD<sub>3</sub>CN.

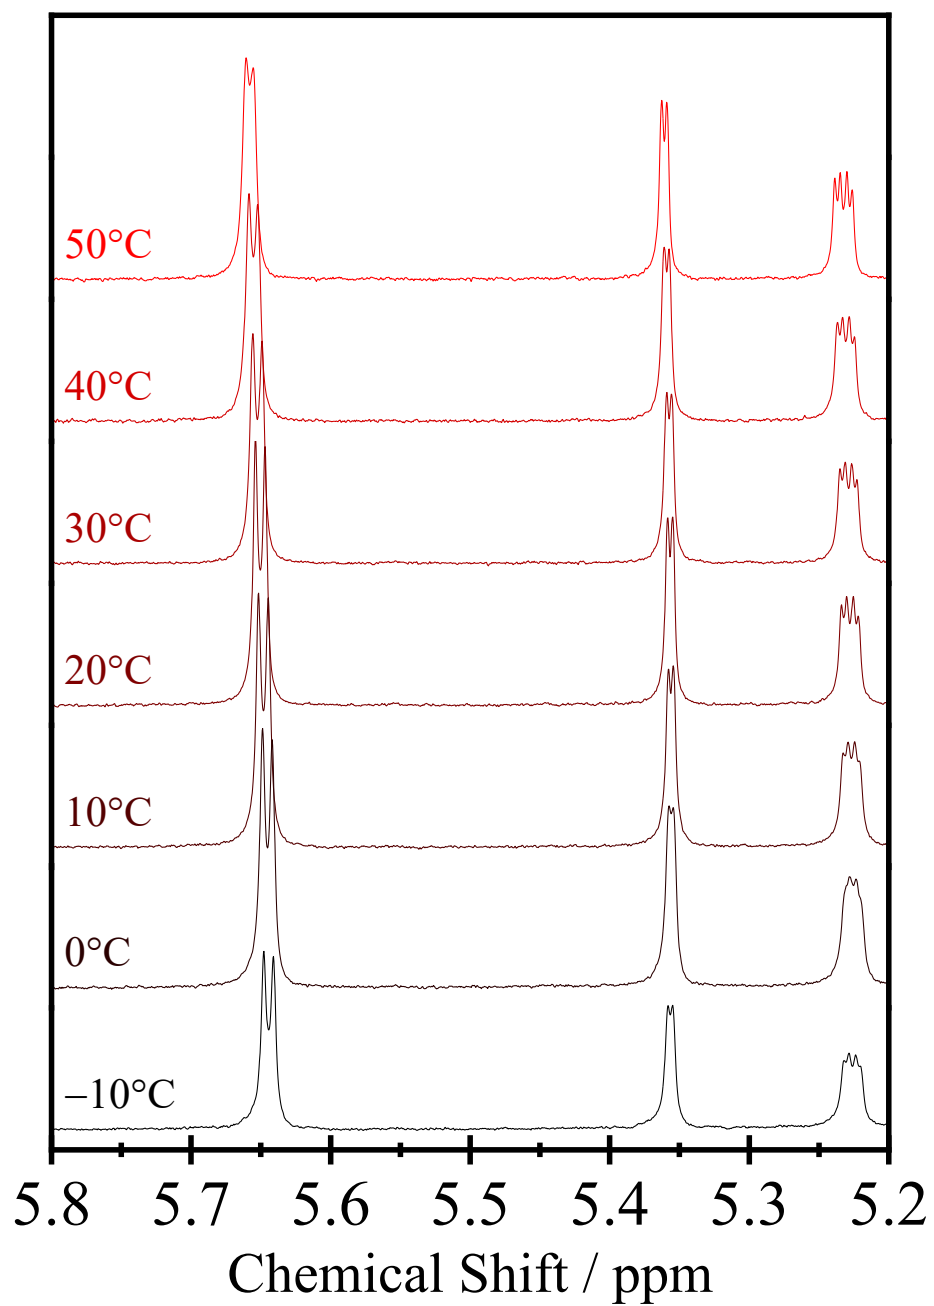

**Figure S8.** Temperature depending <sup>1</sup>H NMR spectrum of 3d/2d in CDCl<sub>3</sub>.

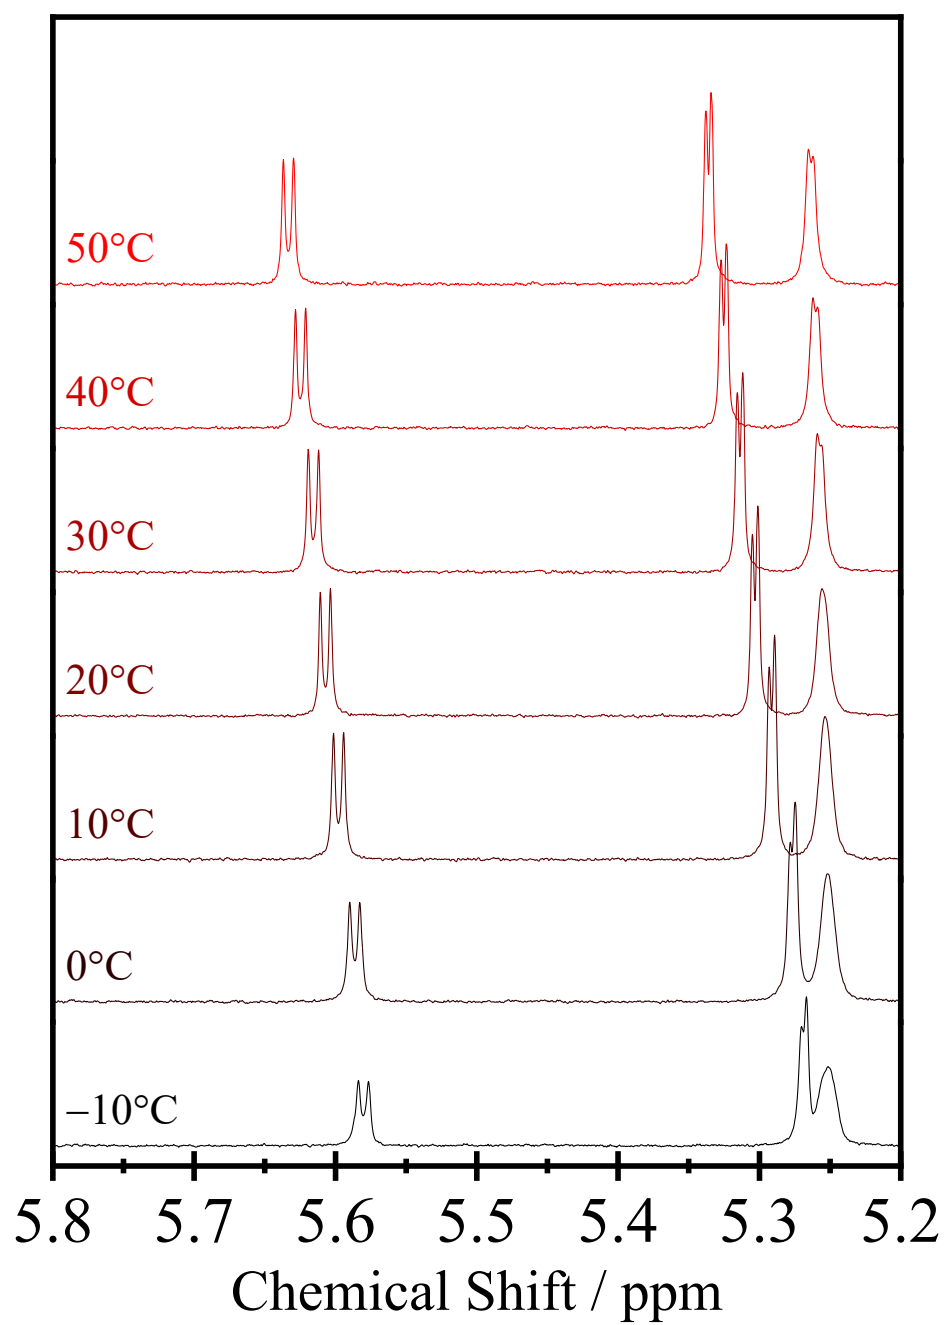

**Figure S9.** Temperature depending  $^1\text{H}$  NMR spectrum of **3d/2d** in  $\text{CD}_3\text{CN}$ .

### 3. Copies of NMR spectra

2,6,9-Triaza-4,8-dinitro-2,6-dipropylbicyclo[3.3.1]nona-3,7-diene (2a)

2,6,9-Triaza-4,8-dinitro-2,9-dipropylbicyclo[3.3.1]nona-3,7-diene (3a)

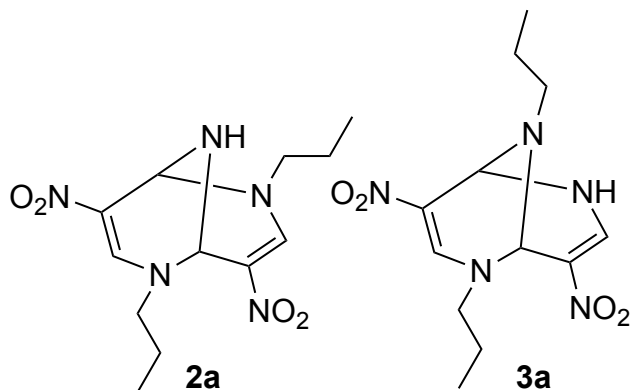

$^1\text{H}$  NMR (400 MHz,  $\text{CDCl}_3$ )

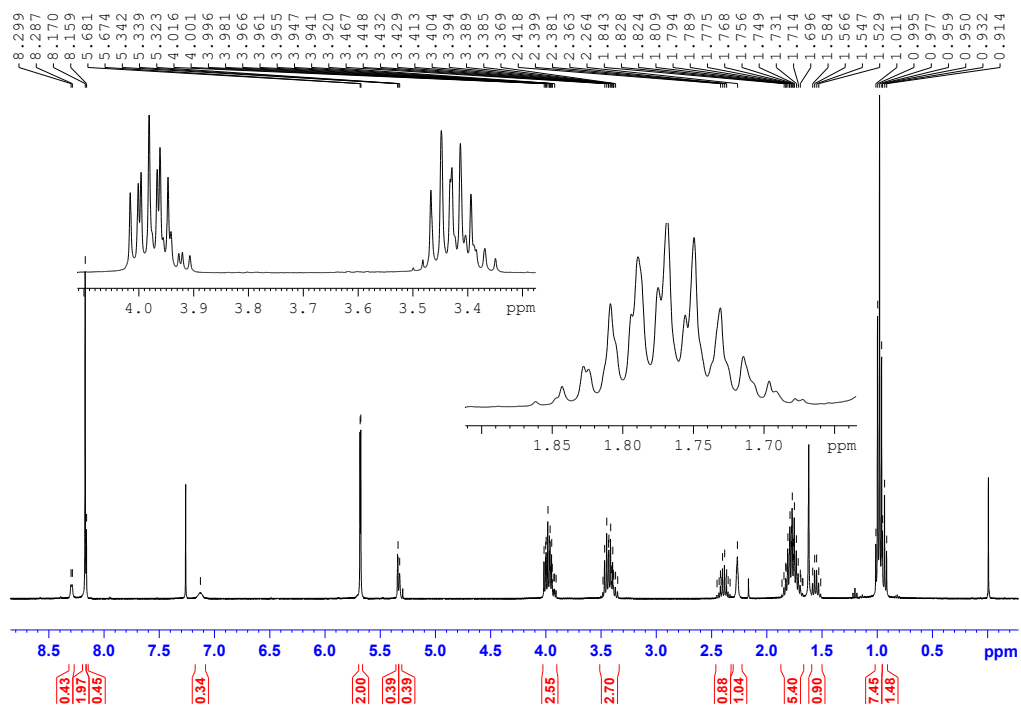

$^{13}\text{C}$  NMR (100 MHz,  $\text{CDCl}_3$ )

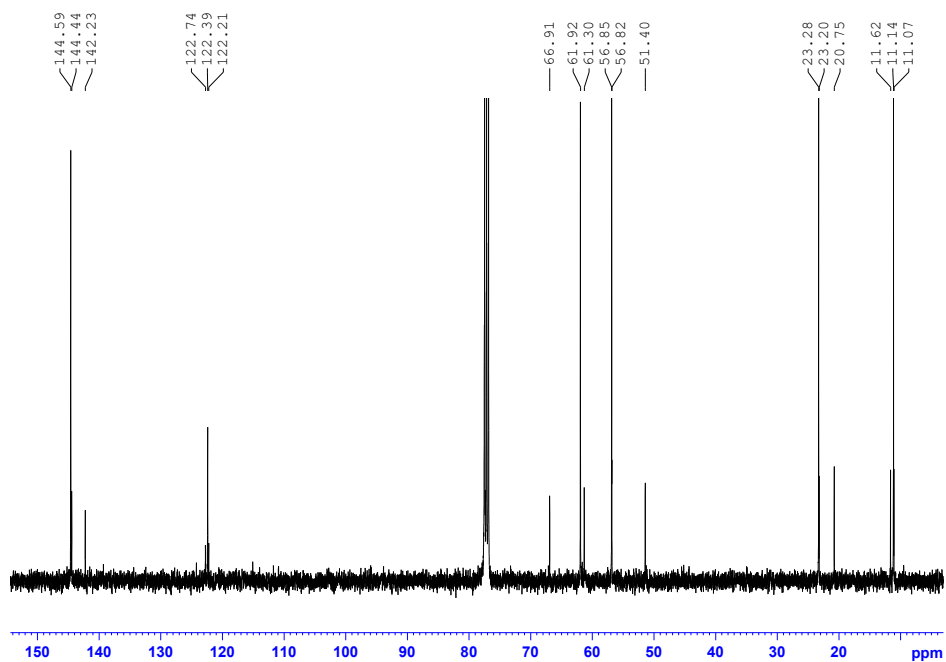

DEPT NMR (100 MHz,  $\text{CDCl}_3$ )

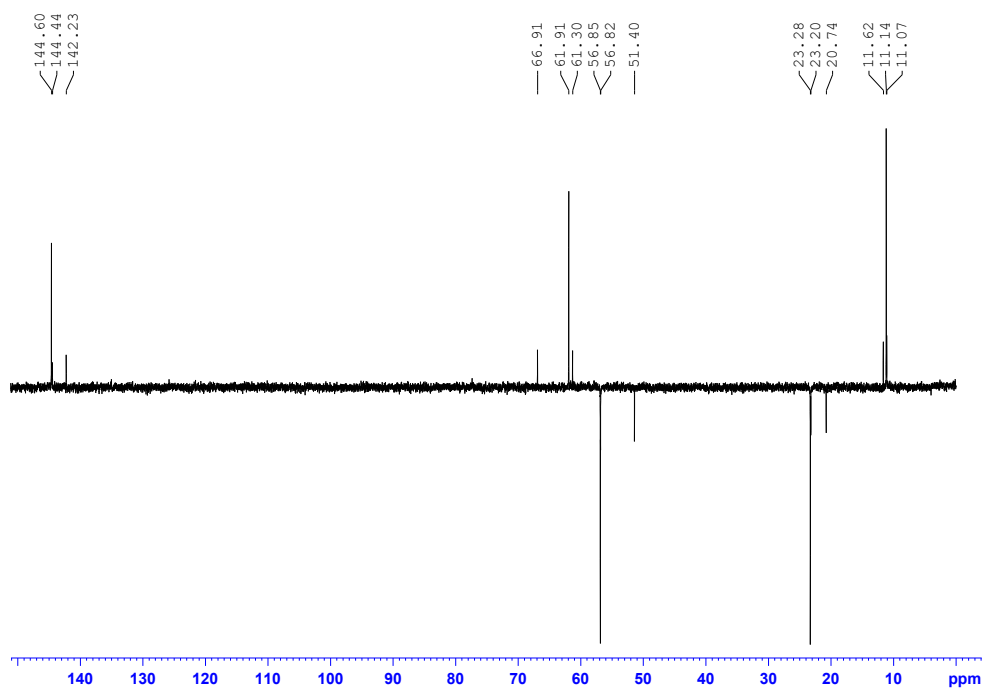

# 1H-1H 2D COSY NMR

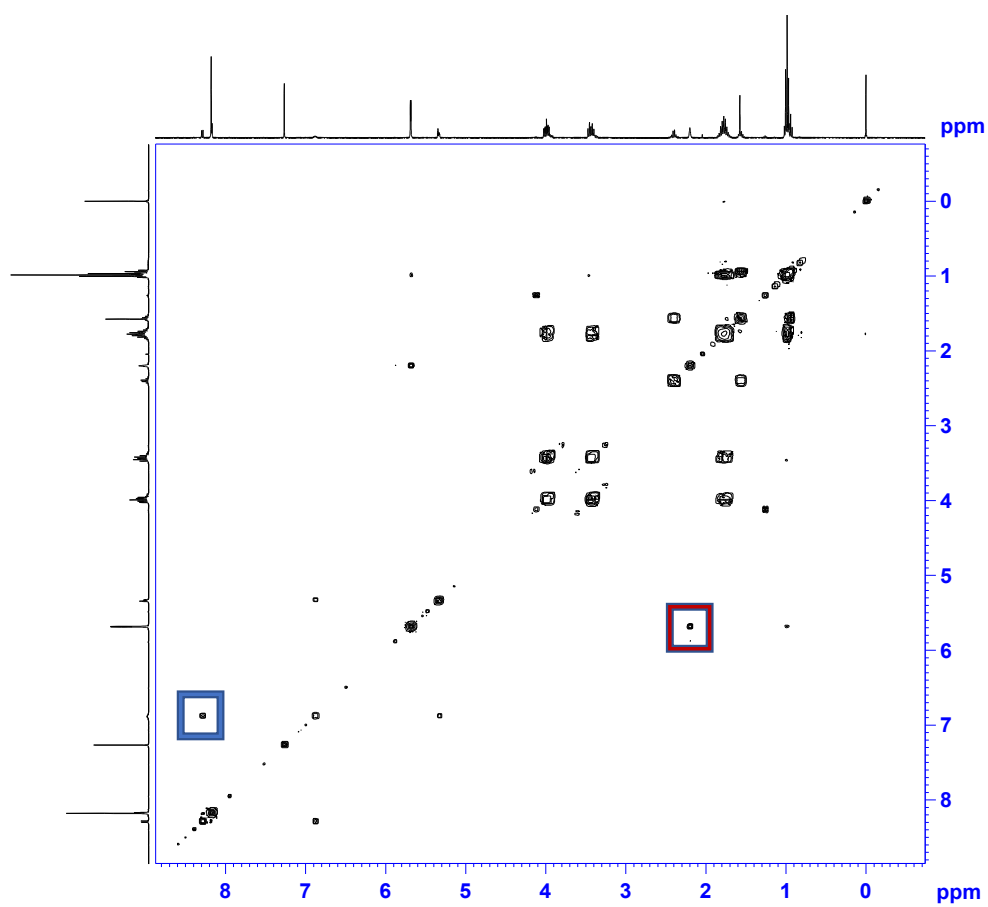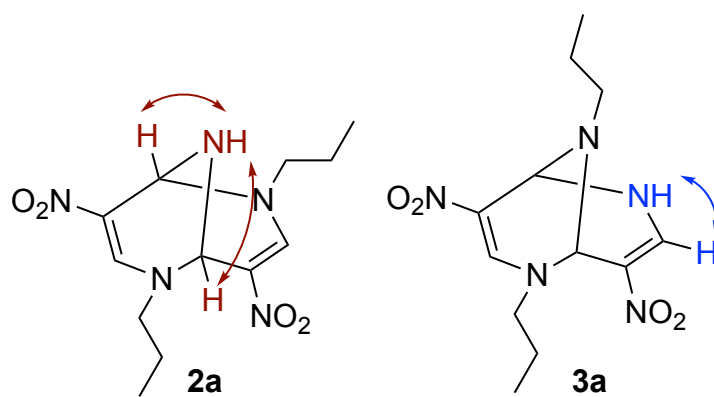

**2,6,9-Triaza-4,8-dinitro-2-propylbicyclo[3.3.1]nona-3,7-diene (4a)**

**2,6,9-Triaza-4,8-dinitro-9-propylbicyclo[3.3.1]nona-3,7-diene (5a)**

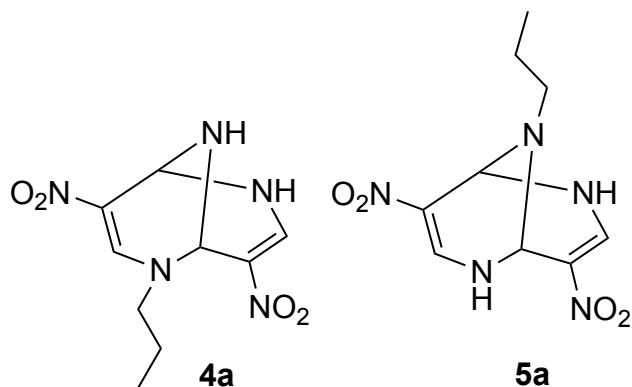

$^1\text{H NMR}$  (400 MHz,  $\text{CD}_3\text{CN}$ )

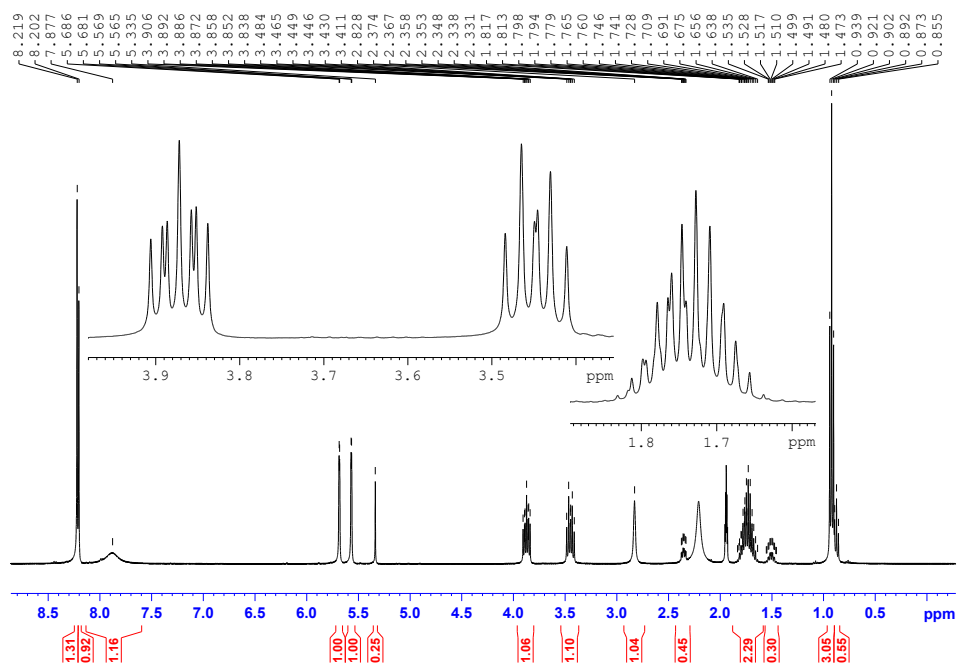

$^{13}\text{C}$  NMR (100 MHz,  $\text{CDCl}_3$ )

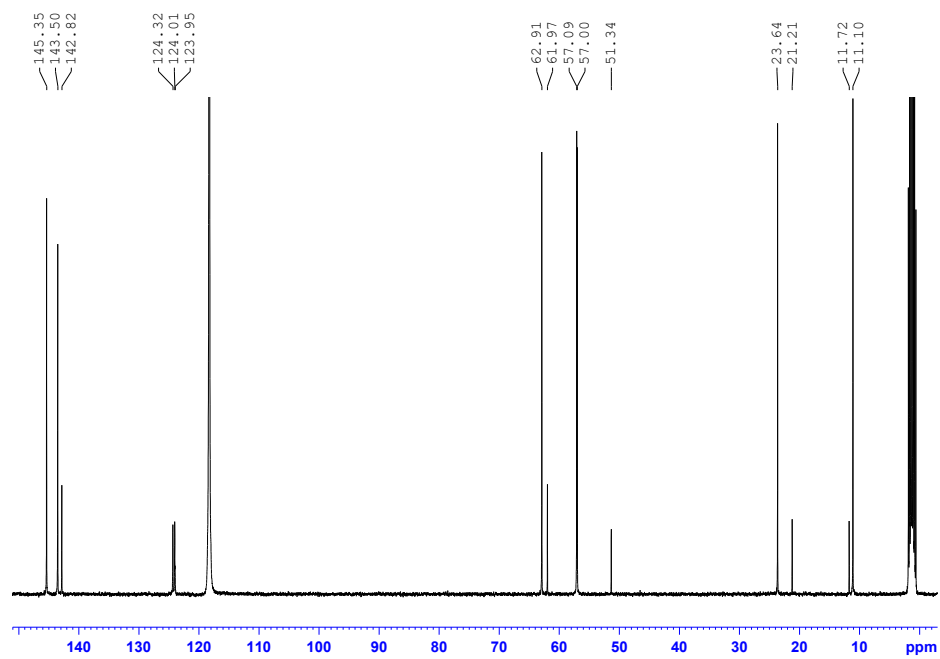

DEPT NMR (100 MHz,  $\text{CDCl}_3$ )

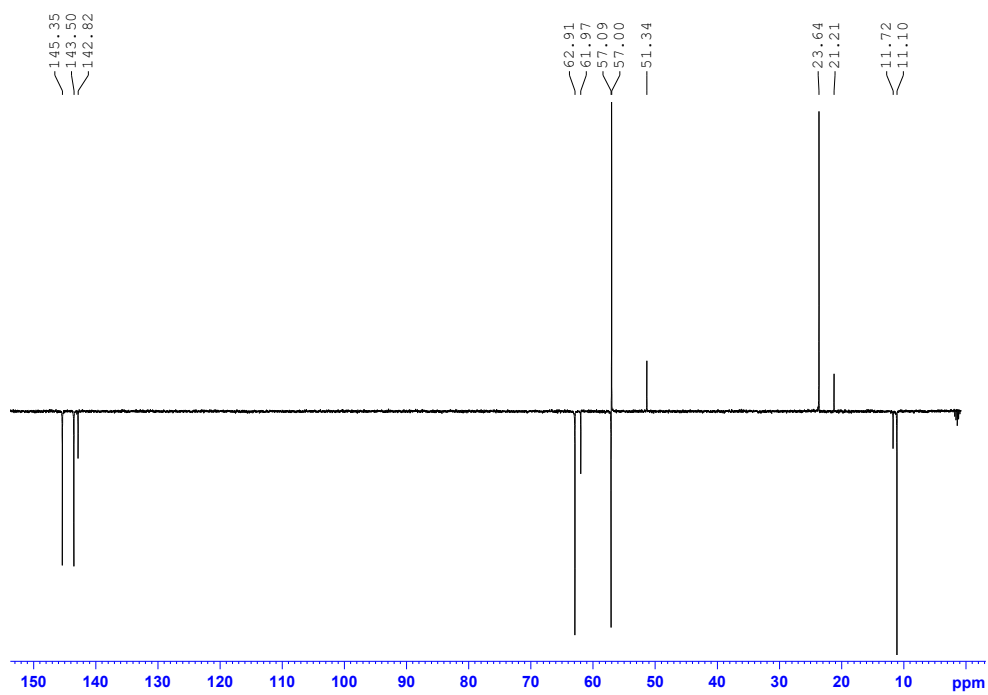



**2,6,9-Triaza-2,6-di(2-methylethyl)-4,8-dinitrobicyclo[3.3.1]nona-3,7-diene (2b)**  
**2,6,9-Triaza-2,9-di(2-methylethyl)-4,8-dinitrobicyclo[3.3.1]nona-3,7-diene (3b)**

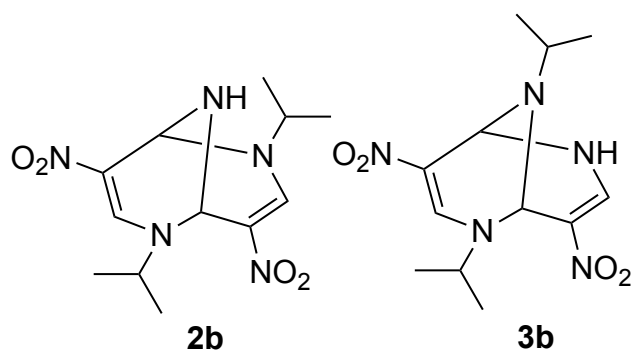

$^1\text{H}$  NMR (400 MHz,  $\text{CDCl}_3$ )

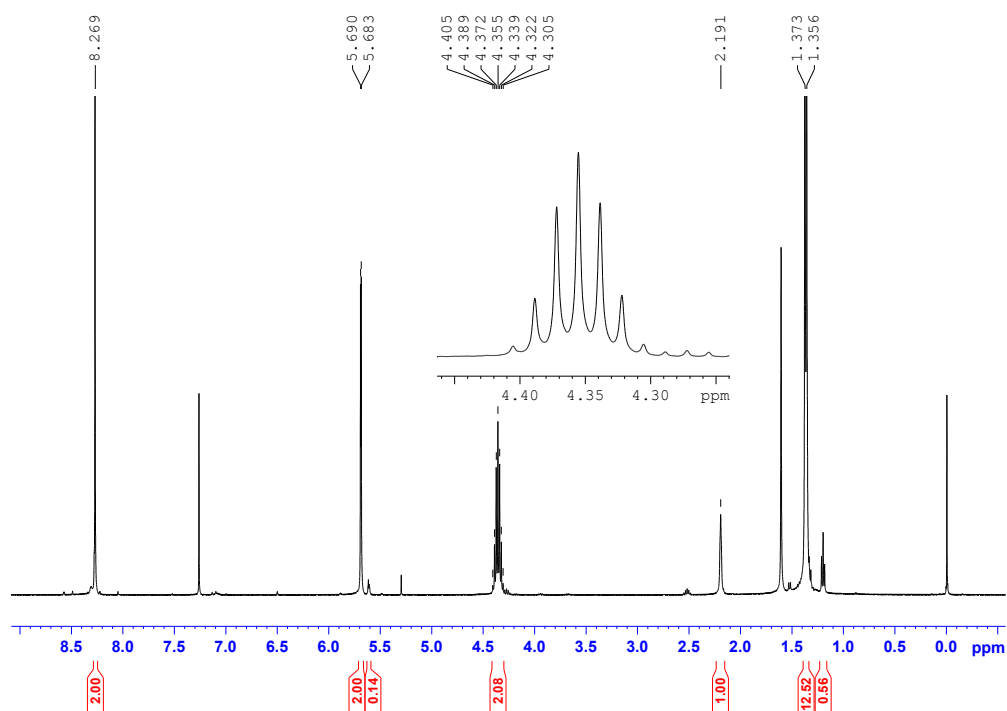

$^{13}\text{C}$  NMR (100 MHz,  $\text{CDCl}_3$ )

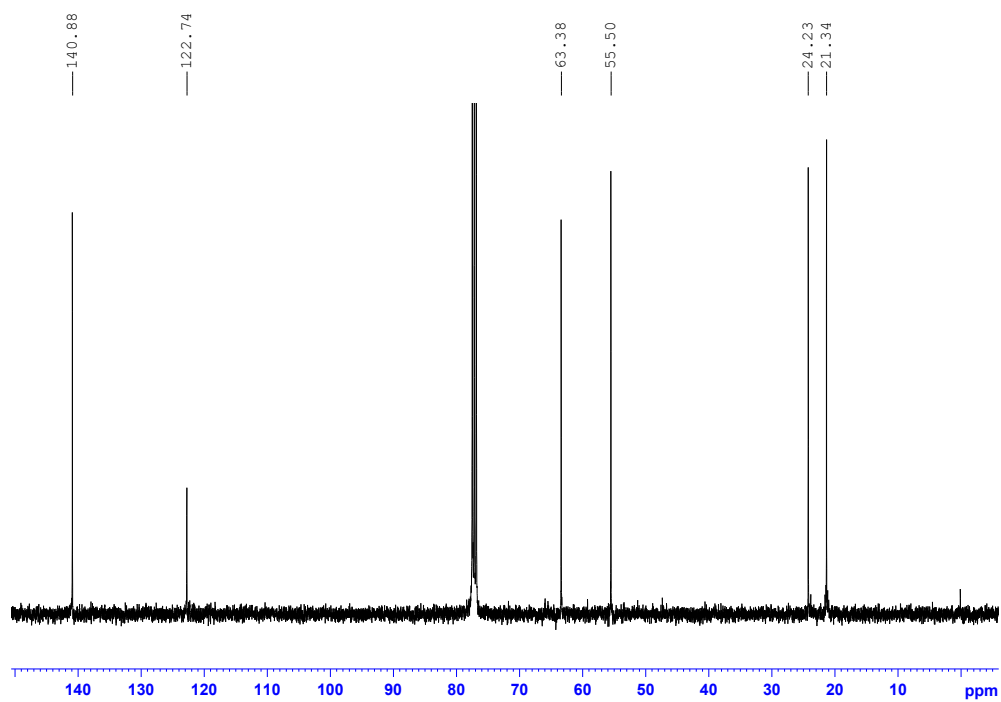

DEPT NMR (100 MHz,  $\text{CDCl}_3$ )

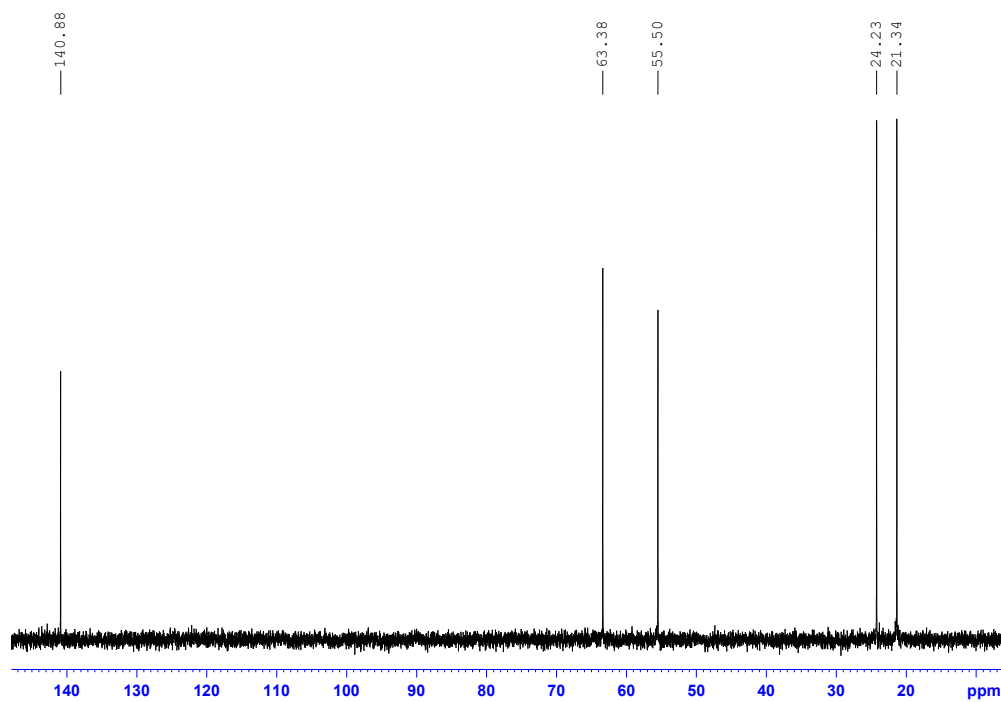

**2,6,9-Triaza-2-(2-methylethyl)-4,8-dinitrobicyclo[3.3.1]nona-3,7-diene (4b)**

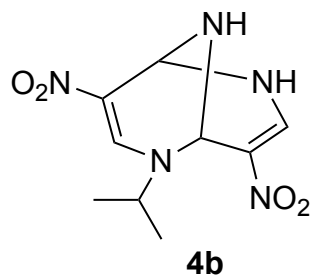

$^1\text{H}$  NMR (400 MHz,  $\text{CD}_3\text{CN}$ )

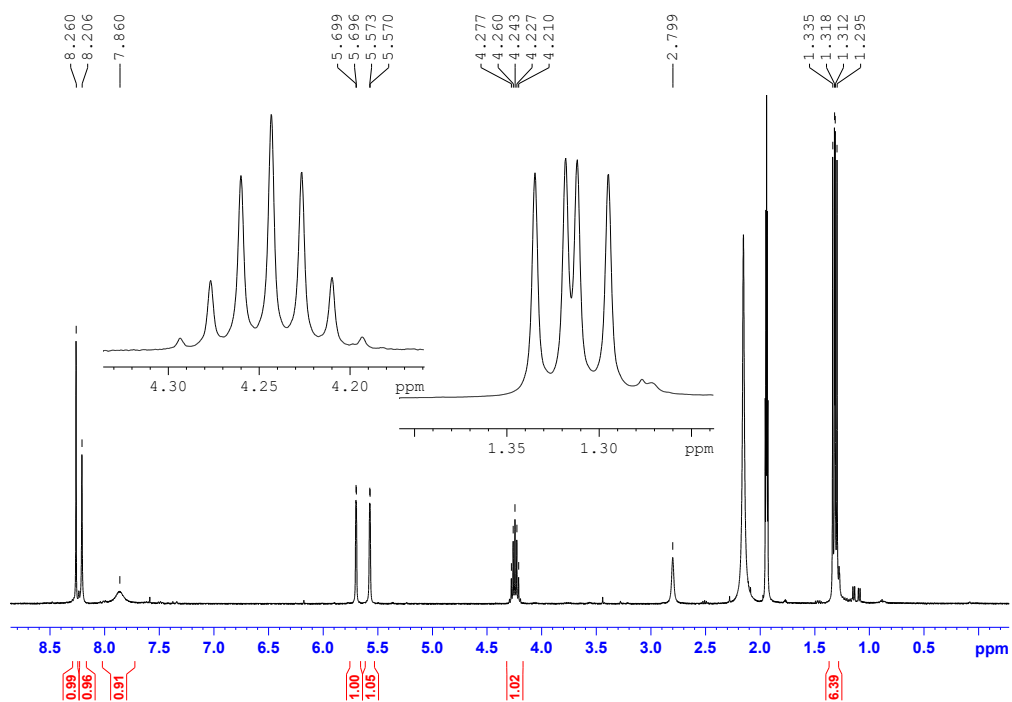

$^{13}\text{C}$  NMR (100 MHz,  $\text{CD}_3\text{CN}$ )

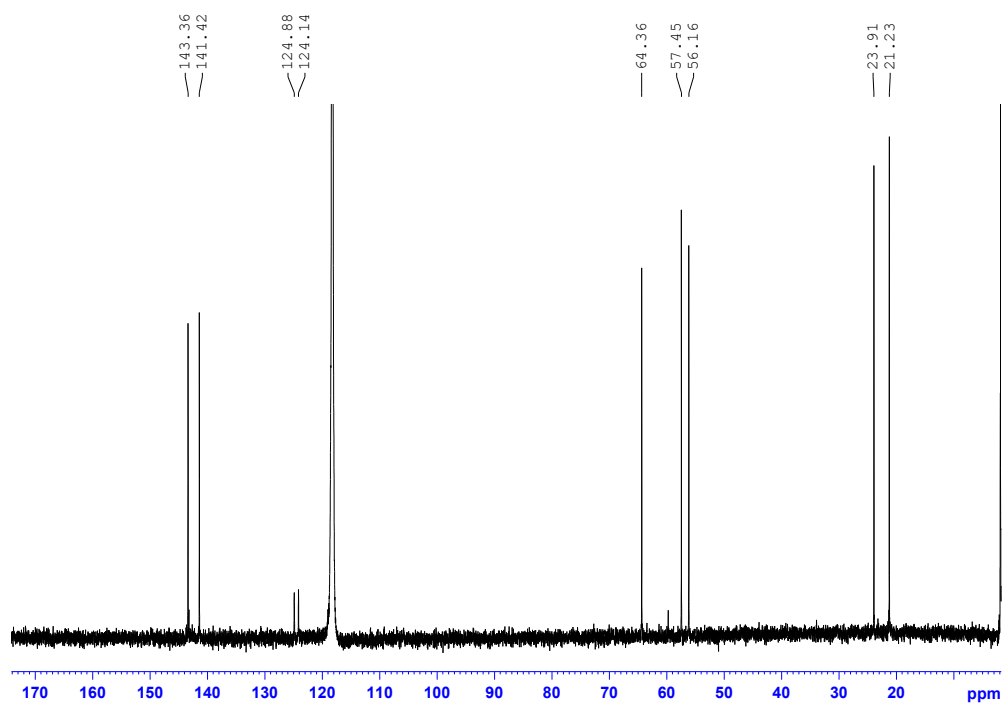

DEPT NMR (100 MHz,  $\text{CD}_3\text{CN}$ )

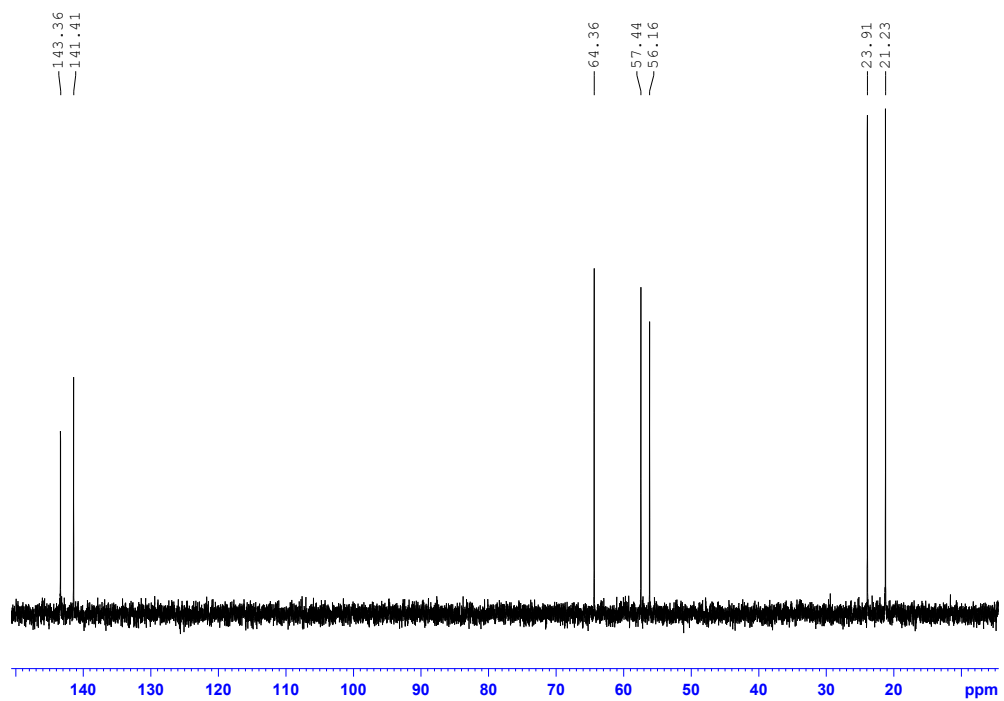

2,6,9-Triaza-4,8-dinitro[3.3.1]nona-3,7-diene (6)

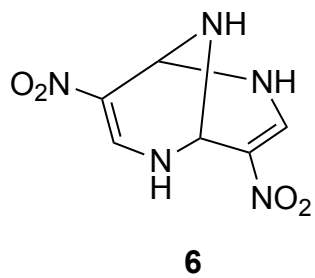

$^1\text{H}$  NMR (400 MHz,  $\text{DMSO-}d_6$ )

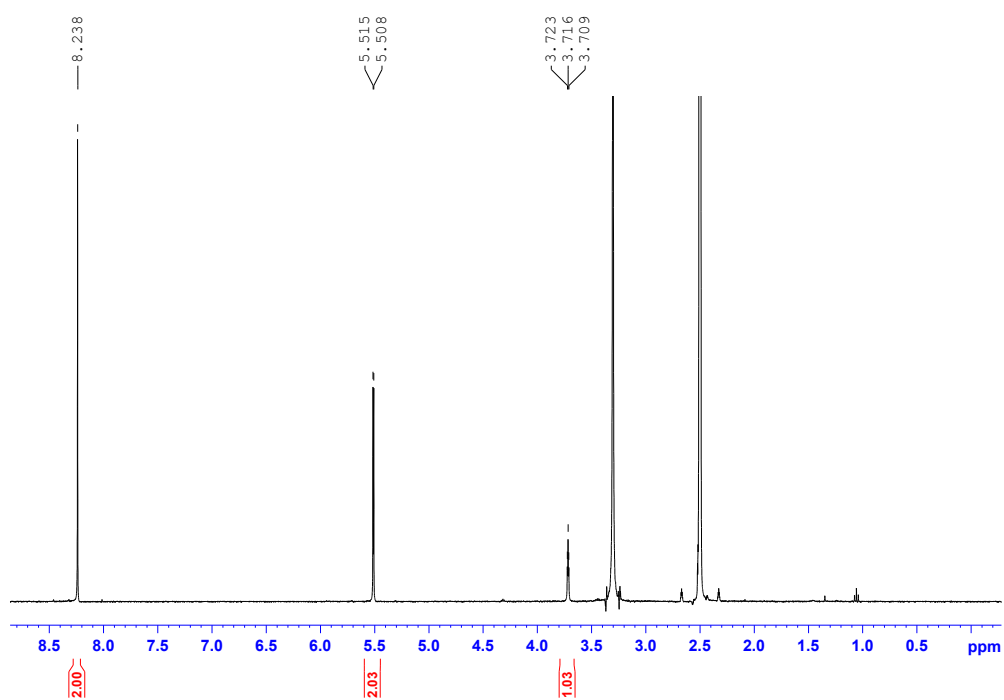

$^{13}\text{C}$  NMR (100 MHz,  $\text{DMSO-}d_6$ )

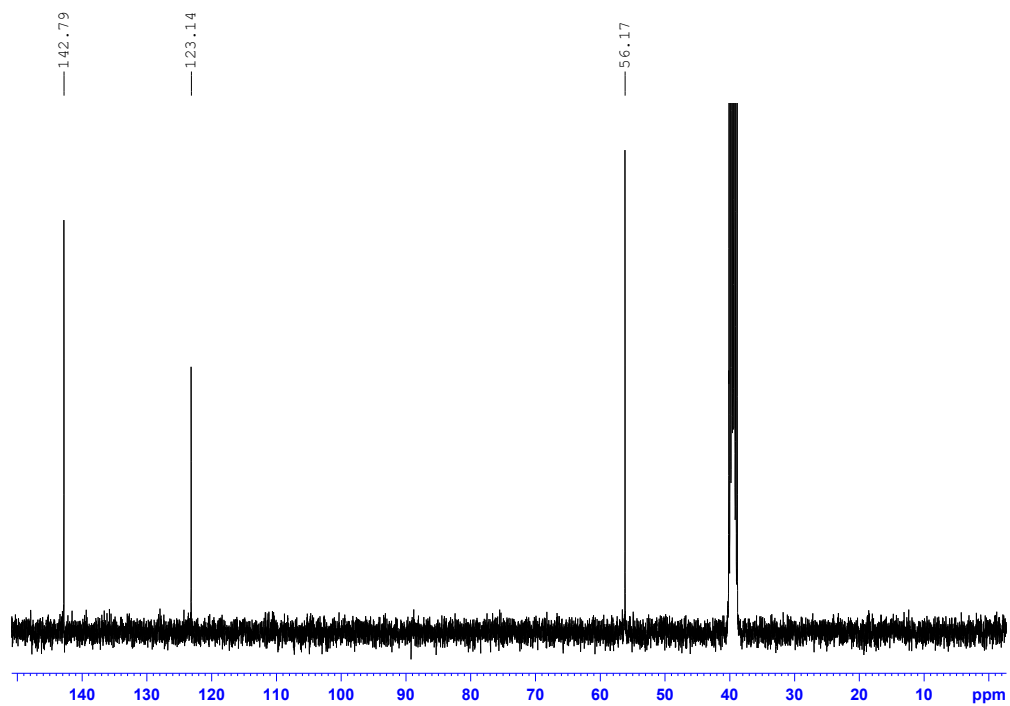

DEPT NMR (100 MHz,  $\text{DMSO-}d_6$ )

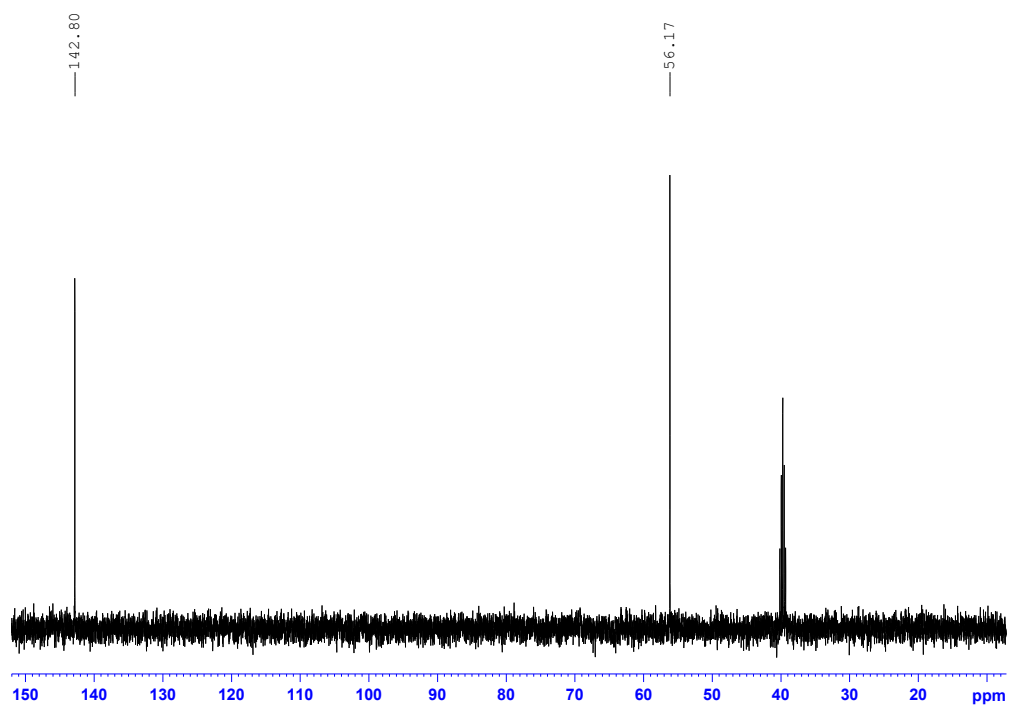

**2,6,9-Triaza-2,6-dibenzyl-4,8-dinitrobicyclo[3.3.1]nona-3,7-diene (2d)**  
**2,6,9-Triaza-2,9-dibenzyl-4,8-dinitrobicyclo[3.3.1]nona-3,7-diene (3d)**

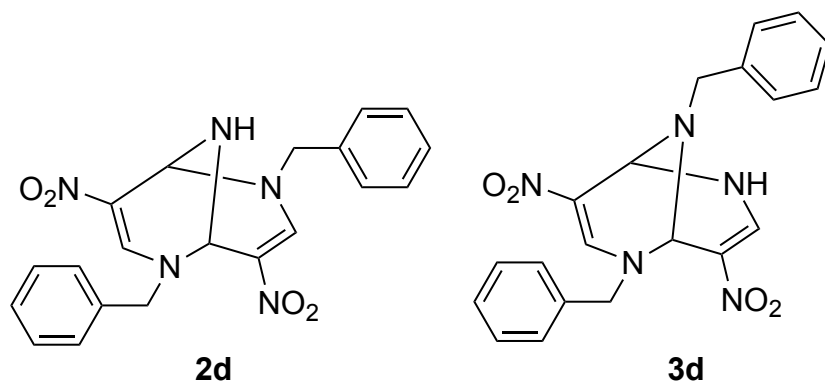

$^1\text{H NMR}$  (400 MHz,  $\text{CDCl}_3$ )

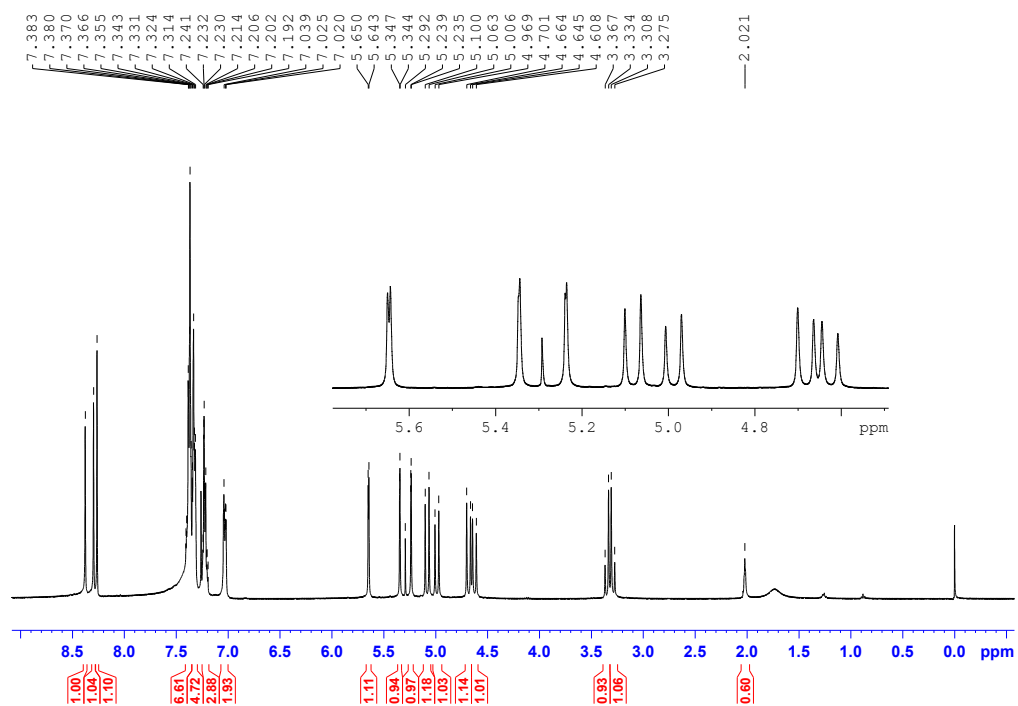

$^{13}\text{C}$  NMR (100 MHz,  $\text{CDCl}_3$ )

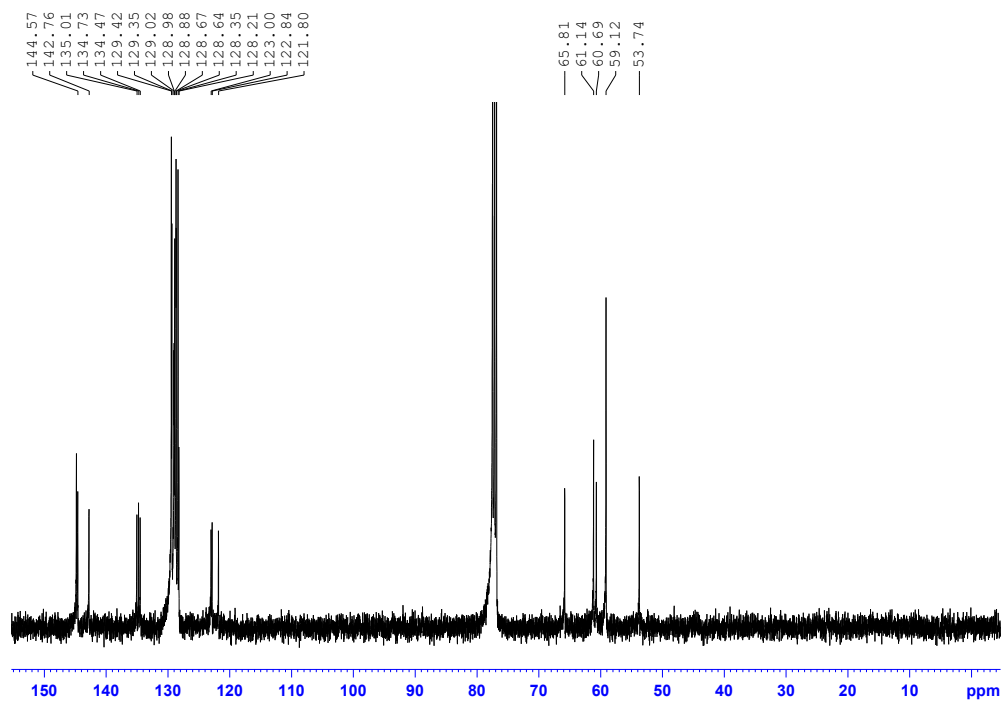

DEPT NMR (100 MHz,  $\text{CDCl}_3$ )

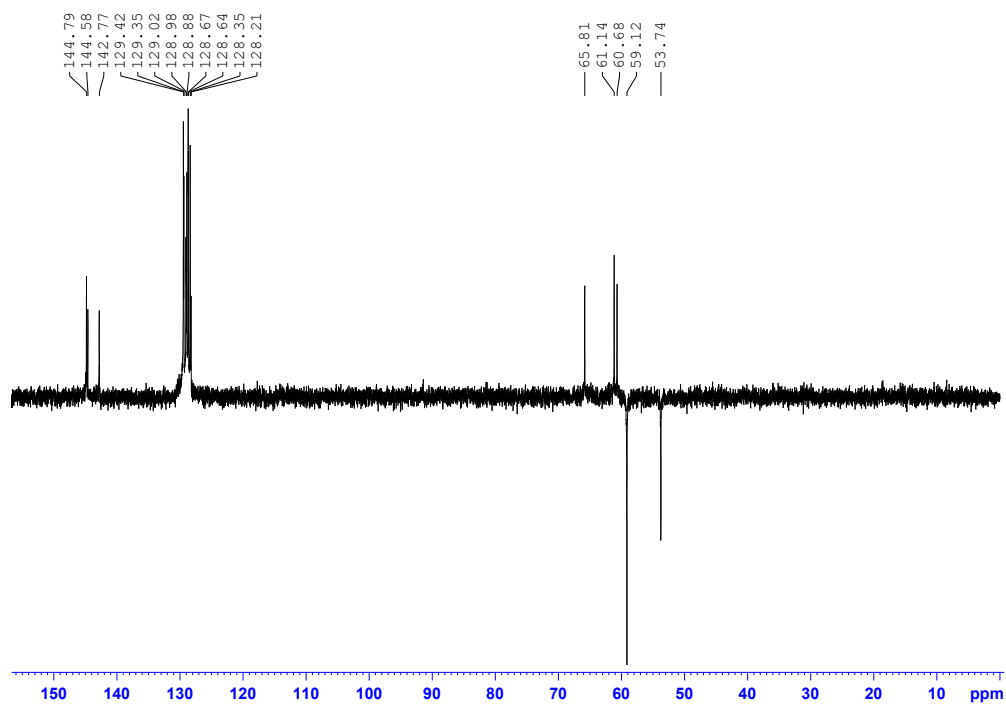



2,6,9-Triaza-2-benzyl-4,8-dinitrobicyclo[3.3.1]nona-3,7-diene (4d)

2,6,9-Triaza-9-benzyl-4,8-dinitrobicyclo[3.3.1]nona-3,7-diene (5d)

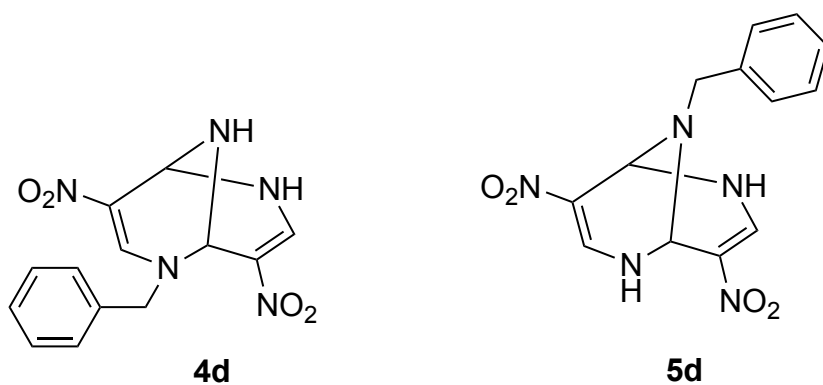

$^1\text{H}$  NMR (400 MHz,  $\text{CD}_3\text{CN}$ )

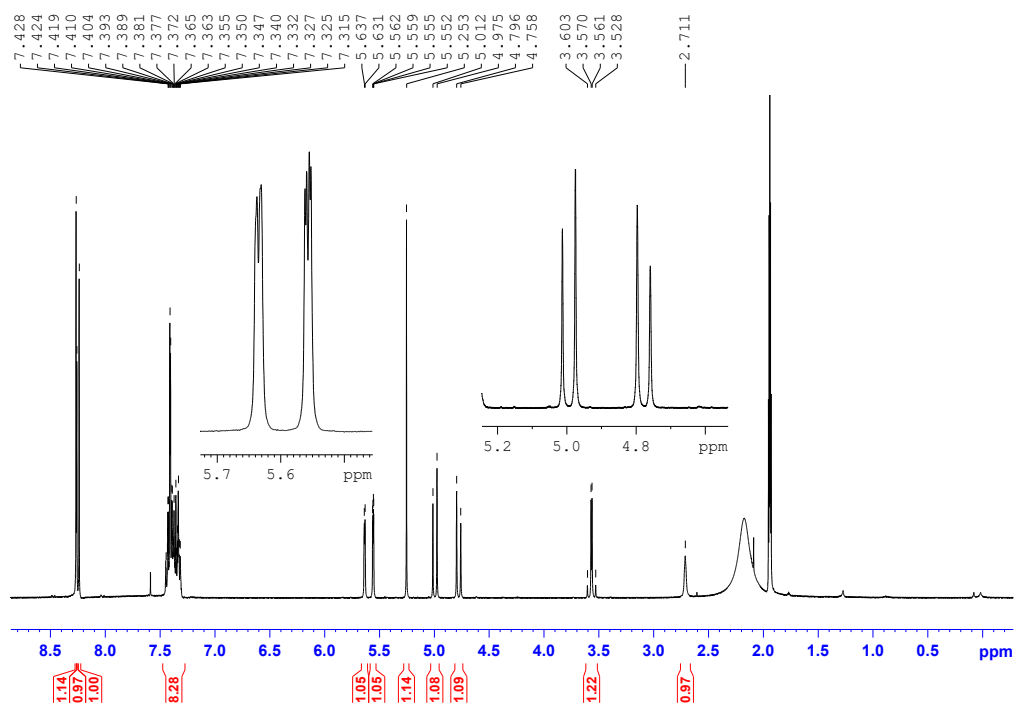

$^{13}\text{C}$  NMR (100 MHz,  $\text{CD}_3\text{CN}$ )

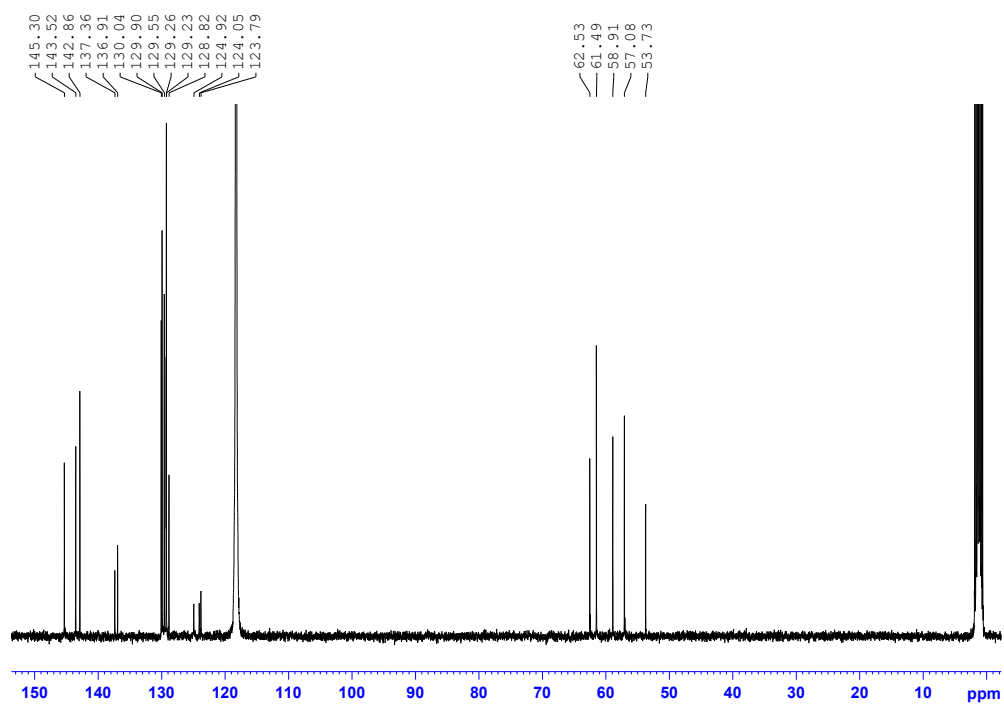

DEPT NMR (100 MHz,  $\text{CD}_3\text{CN}$ )

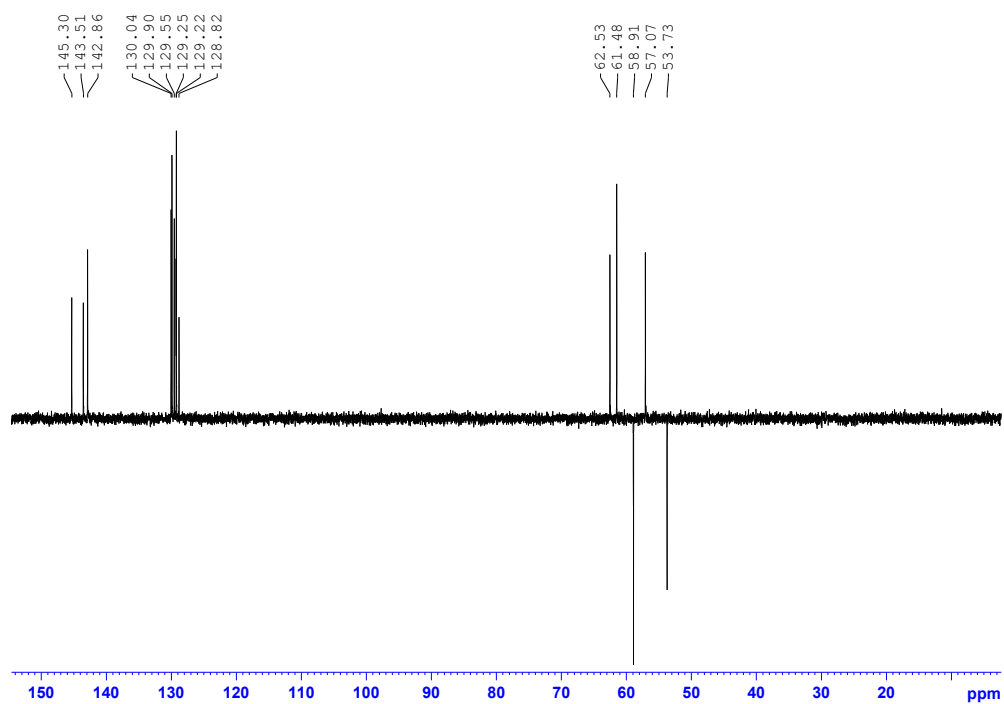

**2,6,9-Triaza-4,8-dinitro-2,6-di(3-propen-1-yl)bicyclo[3.3.1]nona-3,7-diene (2e)**  
**2,6,9-Triaza-4,8-dinitro-2,9-di(3-propen-1-yl)bicyclo[3.3.1]nona-3,7-diene (3e)**

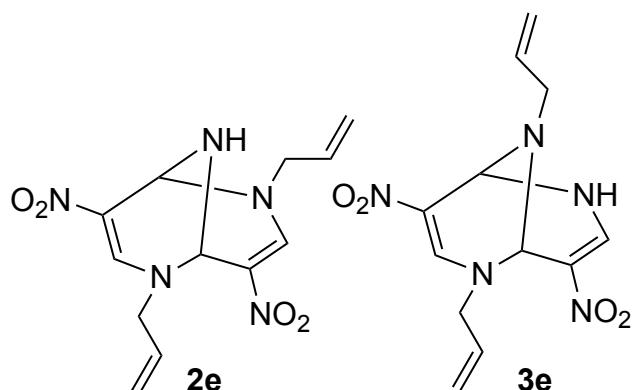

$^1\text{H}$  NMR (400 MHz,  $\text{CDCl}_3$ )

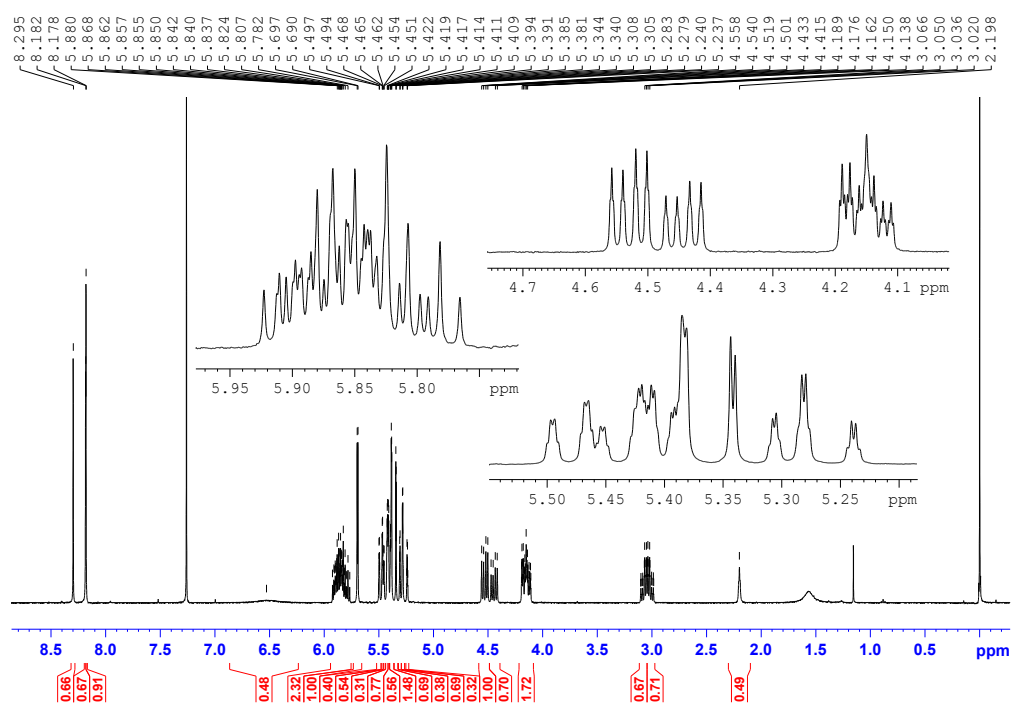

$^{13}\text{C}$  NMR (100 MHz,  $\text{CDCl}_3$ )

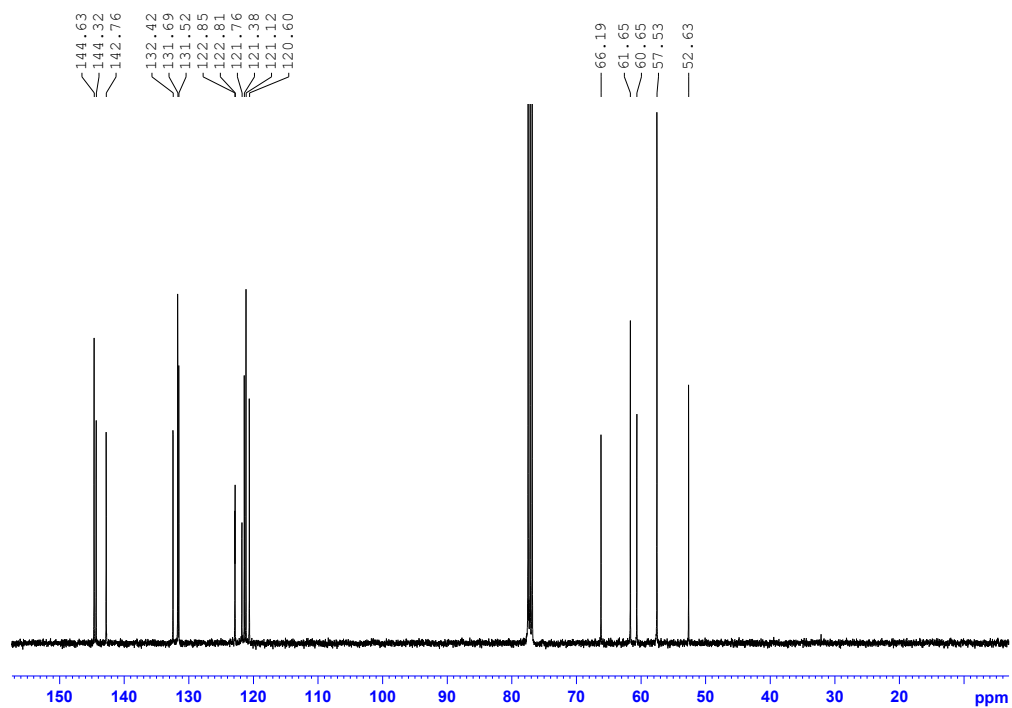

DEPT NMR (100 MHz,  $\text{CD}_3\text{CN}$ )

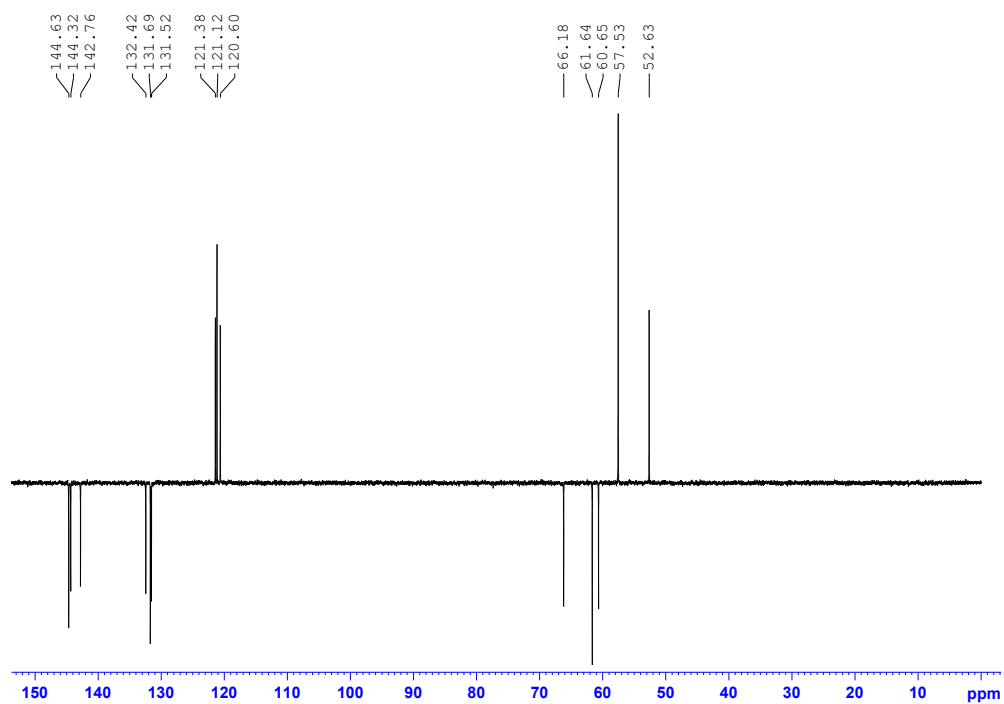

**2,6,9-Triaza-4,8-dinitro-2-(3-propen-1-yl)bicyclo[3.3.1]nona-3,7-diene (4e)**  
**2,6,9-Triaza-4,8-dinitro-9-(3-propen-1-yl)bicyclo[3.3.1]nona-3,7-diene (5e)**

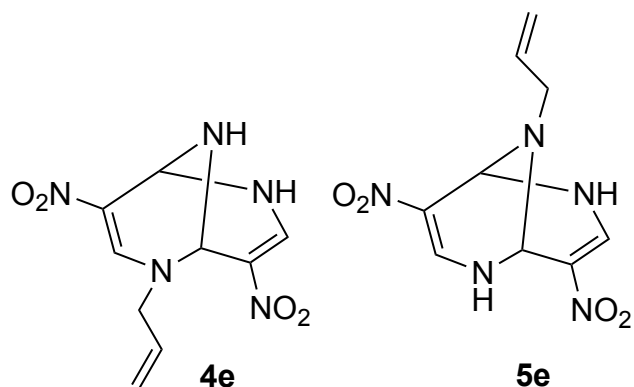

$^1\text{H}$  NMR (400 MHz,  $\text{CD}_3\text{CN}$ )

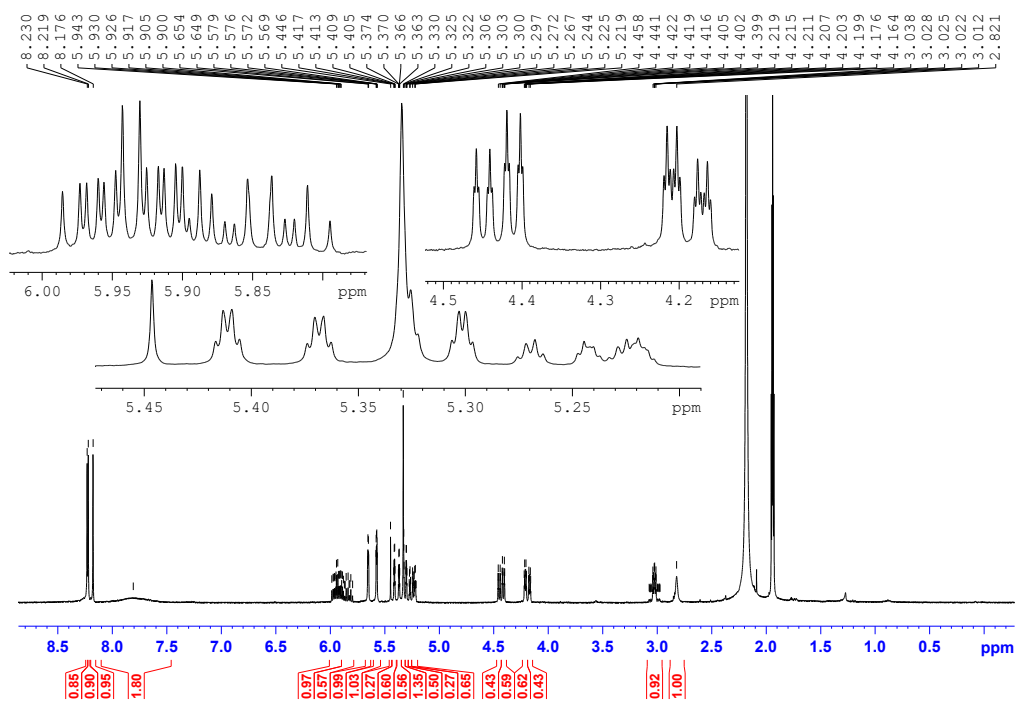

$^{13}\text{C}$  NMR (100 MHz,  $\text{CD}_3\text{CN}$ )

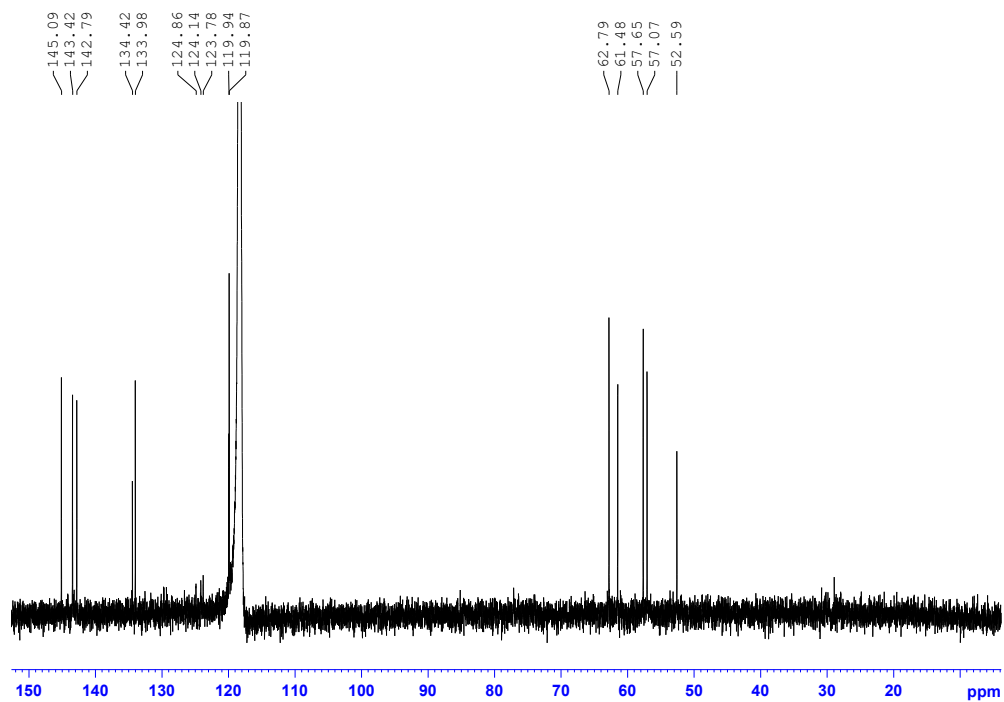

DEPT NMR (100 MHz,  $\text{CD}_3\text{CN}$ )

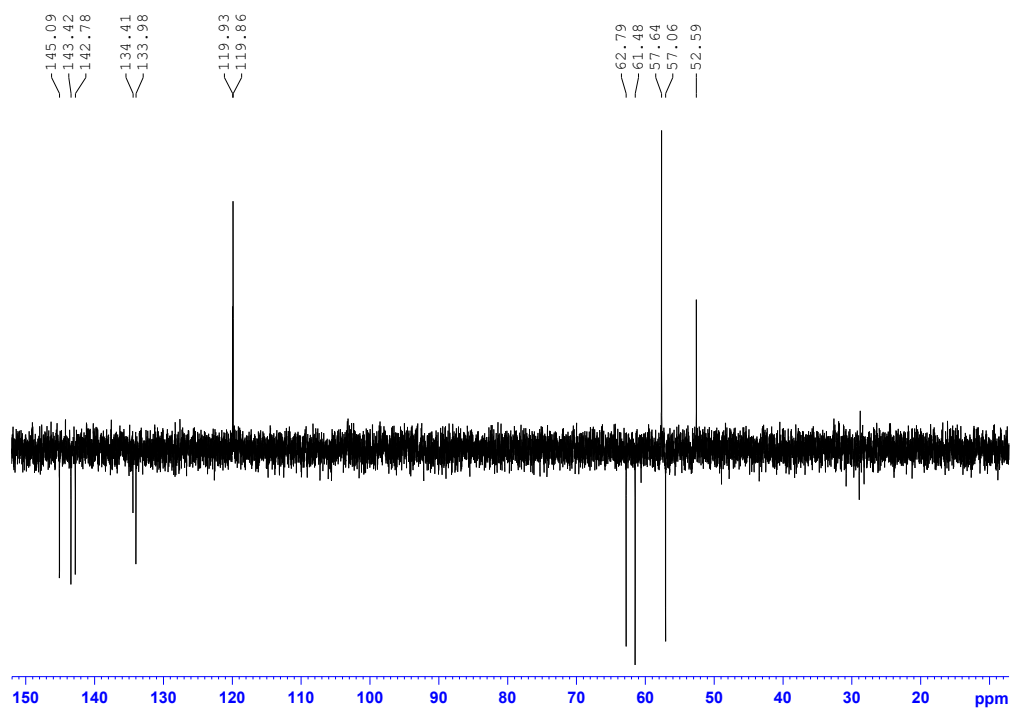

**2,6,9-Triaza-2,6-di(2-hydroxyethyl)-4,8-dinitro[3.3.1]nona-3,7-diene (2f)**  
**2,6,9-Triaza-2,9-di(2-hydroxyethyl)-4,8-dinitro[3.3.1]nona-3,7-diene (3f)**

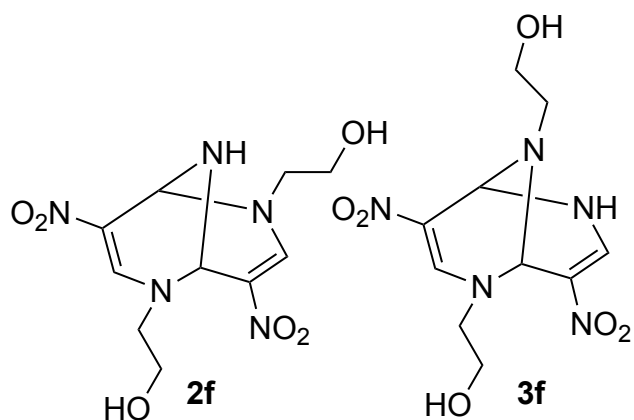

$^1\text{H NMR}$  (400 MHz,  $\text{CD}_3\text{CN}$ )

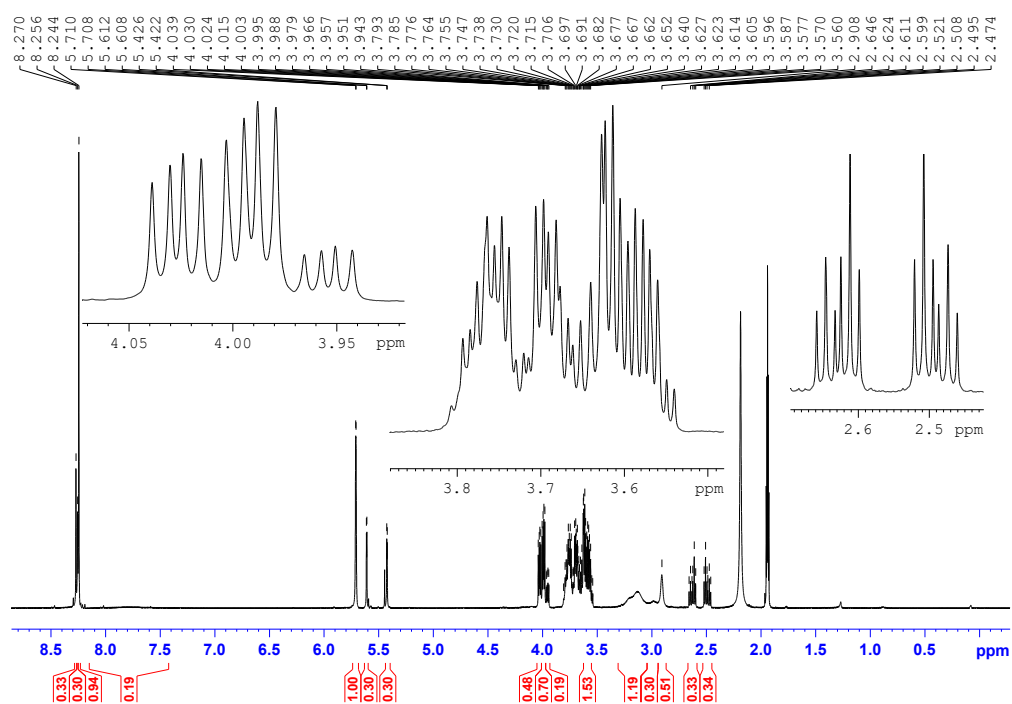

$^{13}\text{C}$  NMR (100 MHz,  $\text{CD}_3\text{CN}$ )

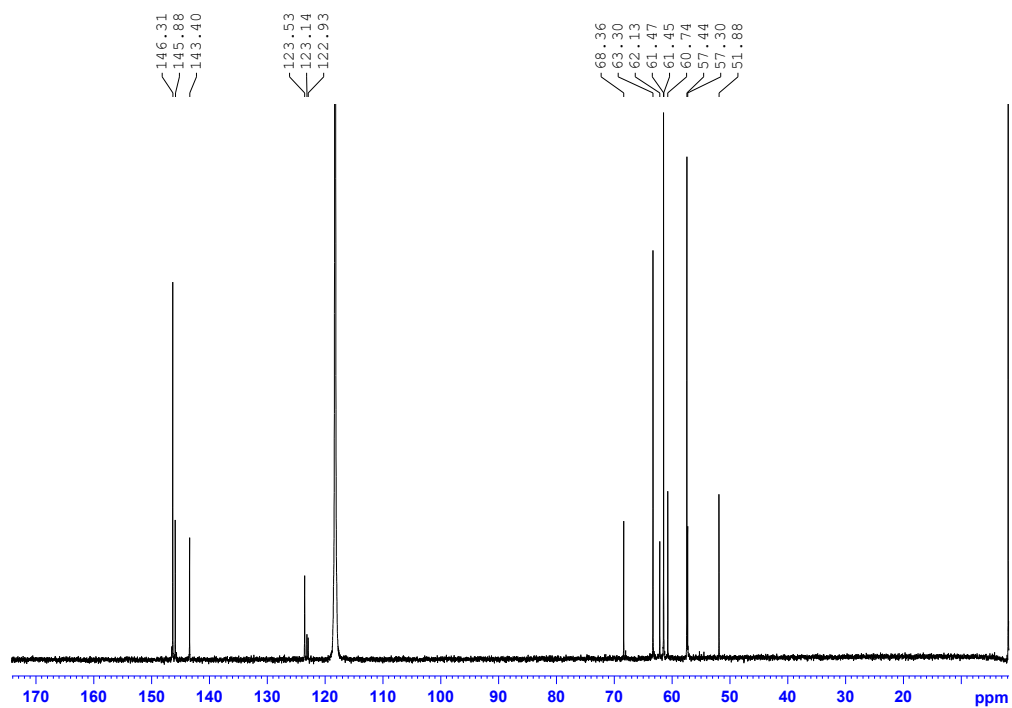

DEPT NMR (100 MHz,  $\text{CD}_3\text{CN}$ )

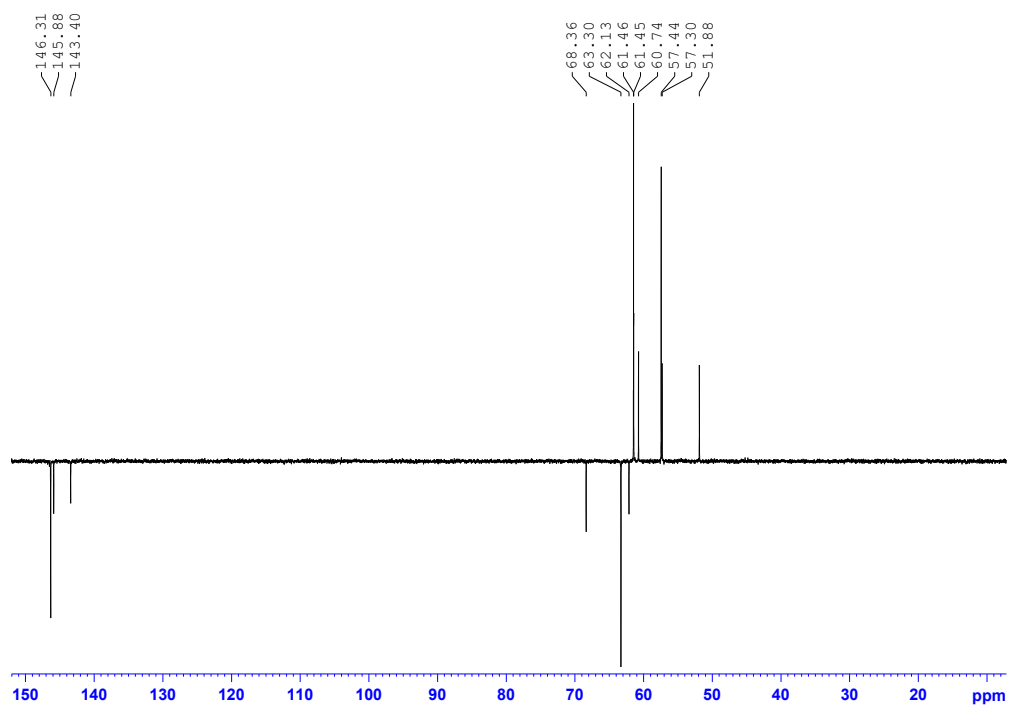



2,6,9-Triaza-2-(2-hydroxyethyl)-4,8-dinitro[3.3.1]nona-3,7-diene (4f)

2,6,9-Triaza-9-(2-hydroxyethyl)-4,8-dinitro[3.3.1]nona-3,7-diene (5f)

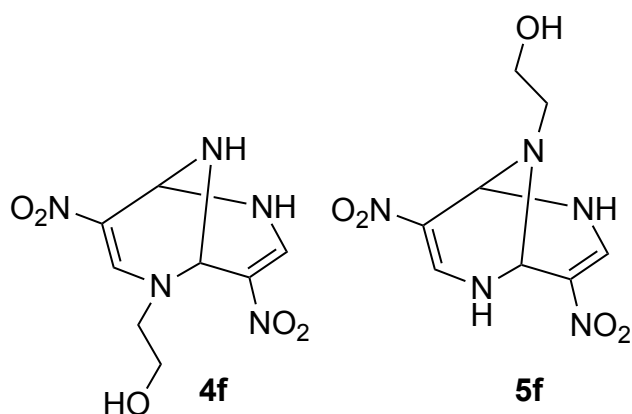

$^1\text{H}$  NMR (400 MHz,  $\text{CD}_3\text{CN}$ )

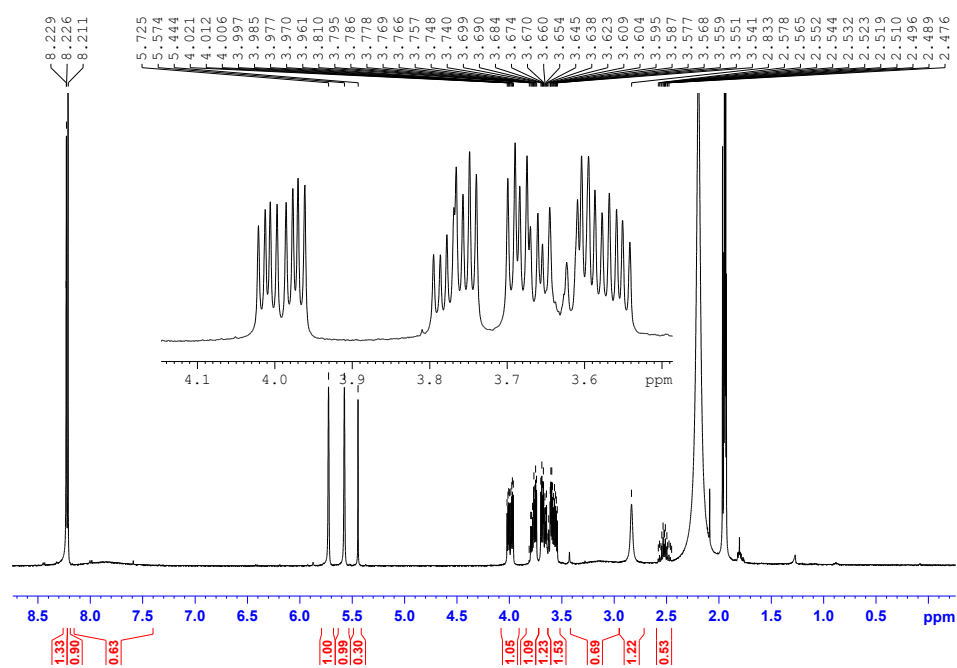

$^{13}\text{C}$  NMR (100 MHz,  $\text{CD}_3\text{CN}$ )

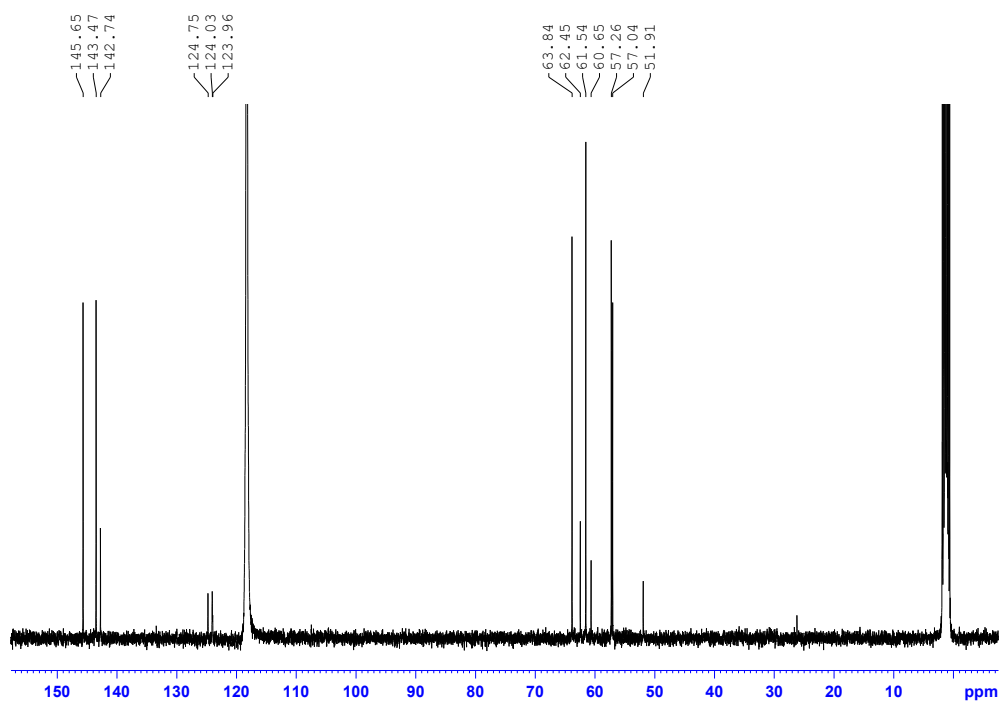

DEPT NMR (100 MHz,  $\text{CD}_3\text{CN}$ )

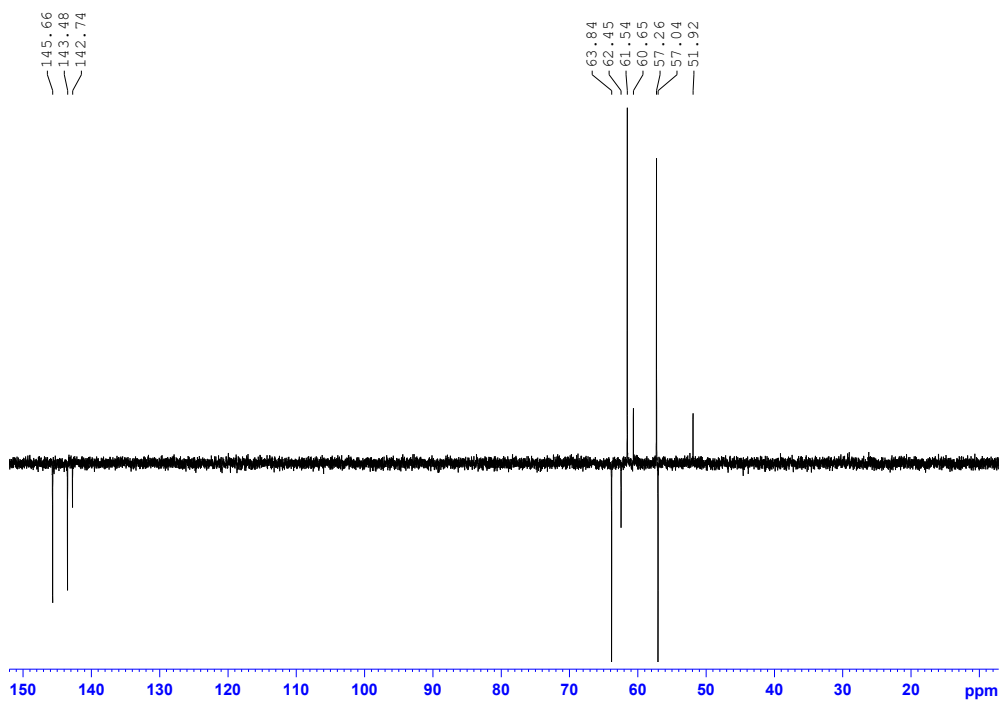

### 4-Aza-2-nitro-5-phenyl-2-pentenal (1d)

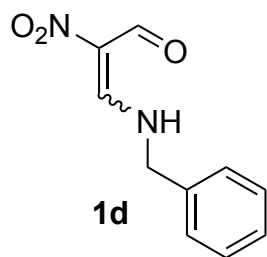

$^1\text{H}$  NMR (400 MHz,  $\text{CDCl}_3$ )

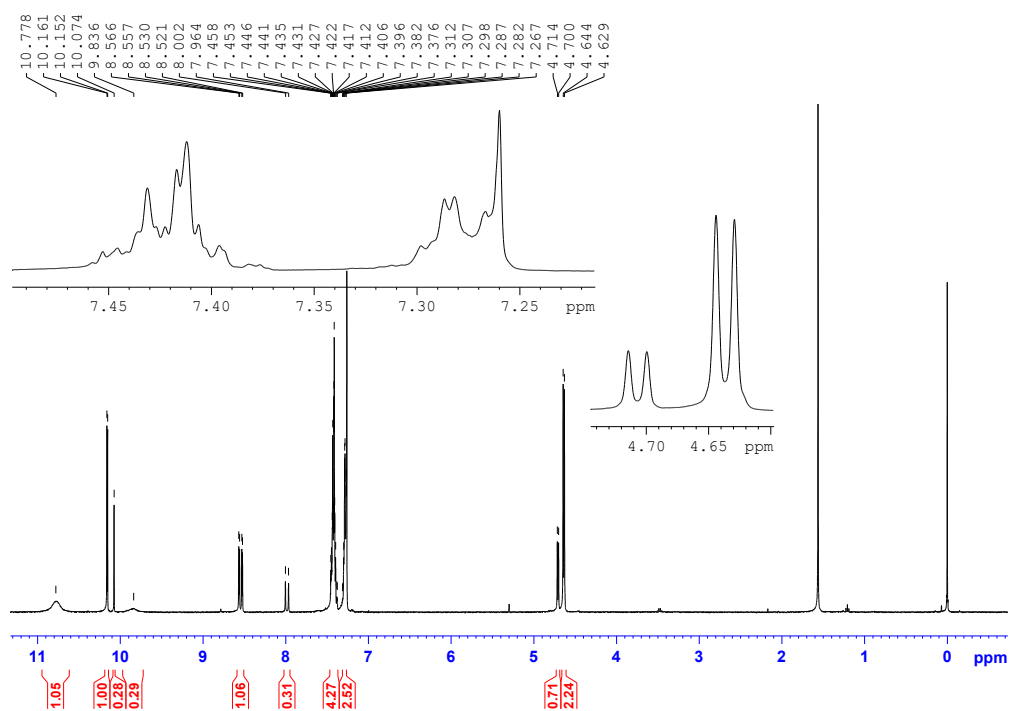

$^{13}\text{C}$  NMR (100 MHz,  $\text{CDCl}_3$ )

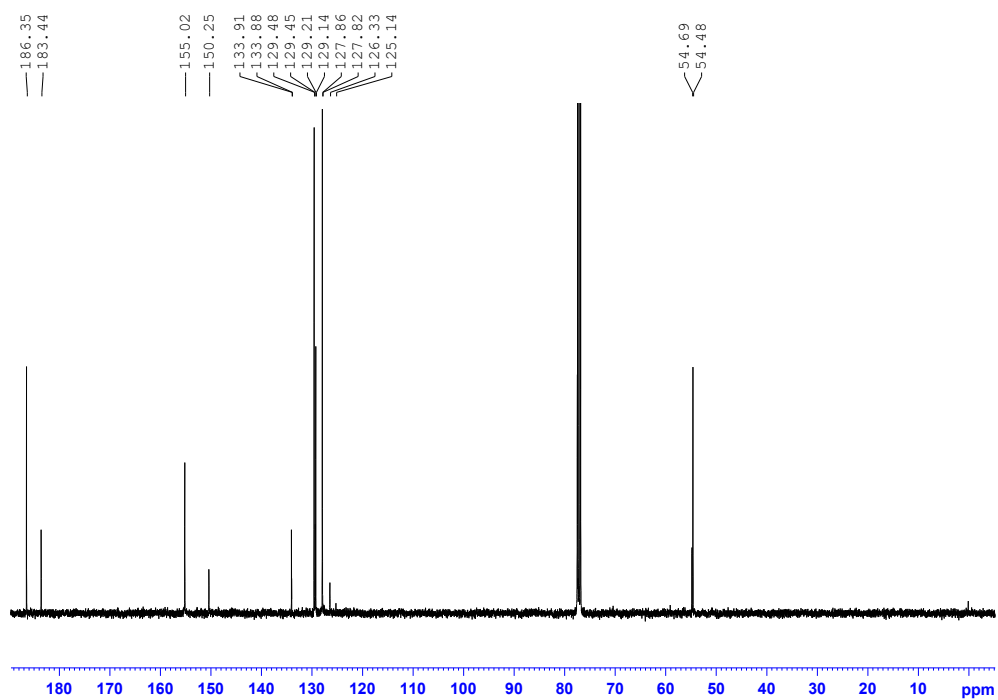

DEPT NMR (100 MHz,  $\text{CDCl}_3$ )

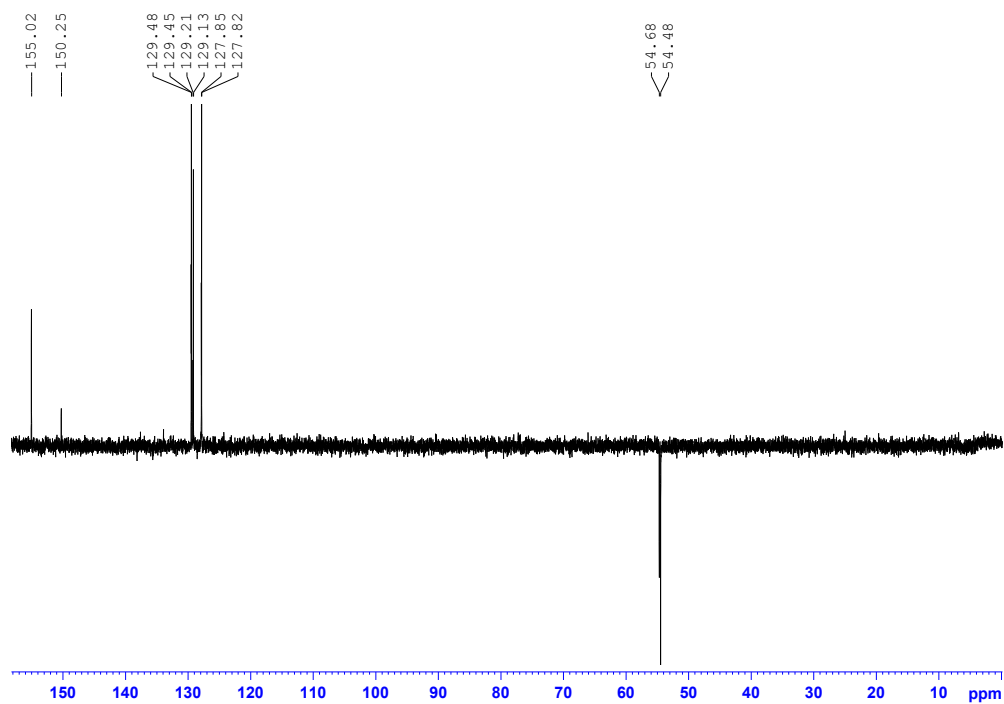

### 4-Aza-6-hydroxy-2-nitro-2-hexenal (1f)

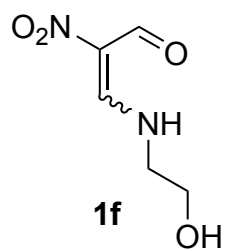

$^1\text{H}$  NMR (400 MHz,  $\text{CD}_3\text{CN}$ )

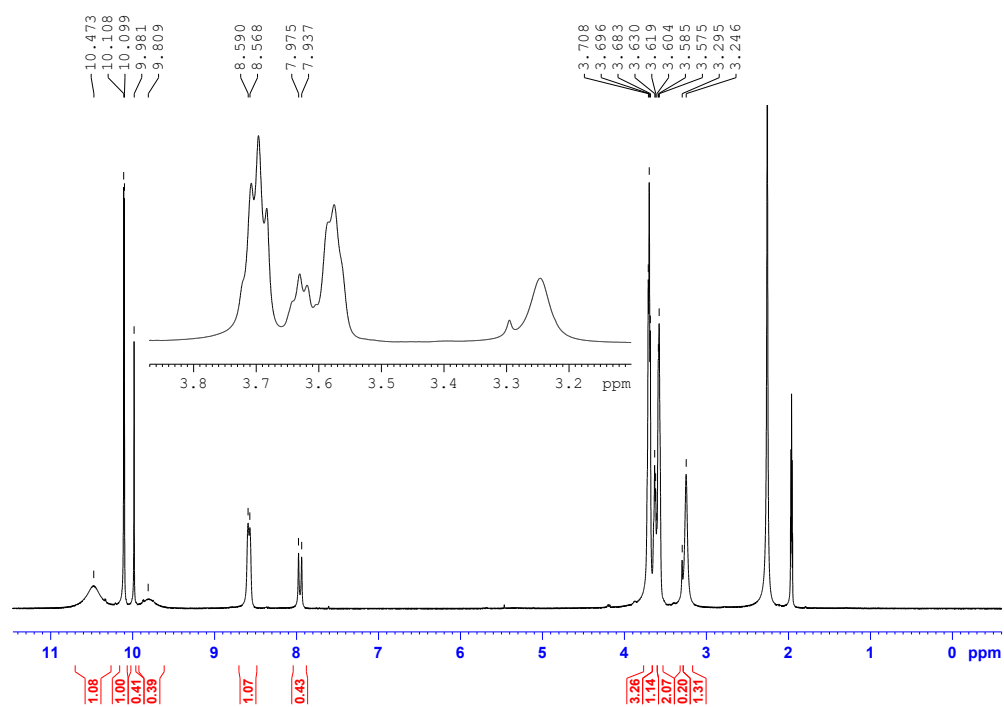

$^{13}\text{C}$  NMR (100 MHz,  $\text{CD}_3\text{CN}$ )

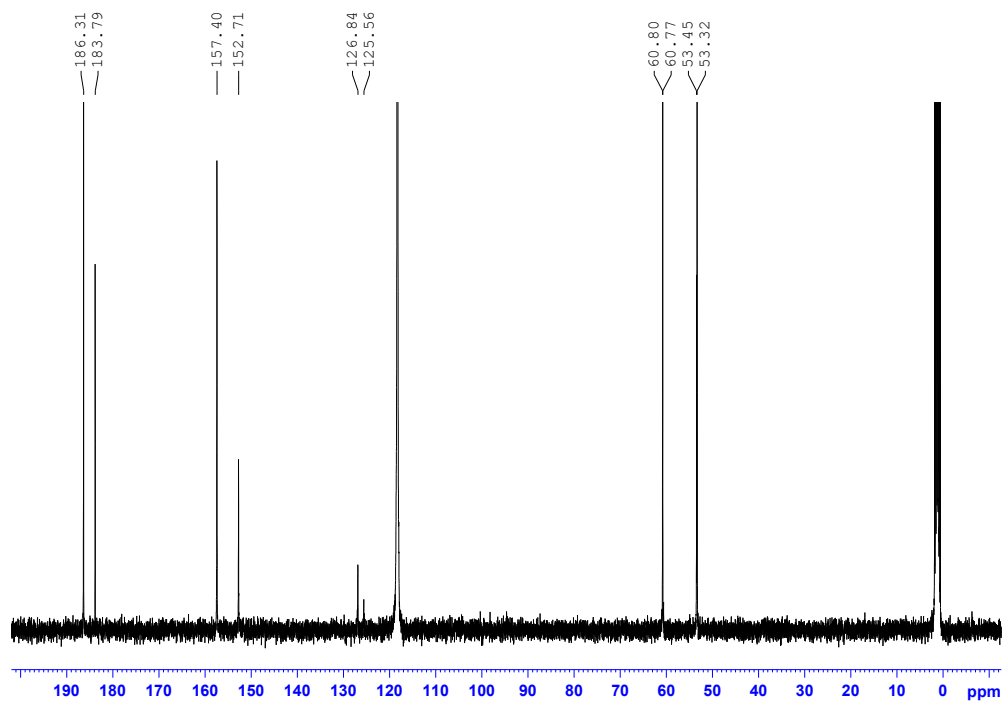

DEPT NMR (100 MHz,  $\text{CD}_3\text{CN}$ )

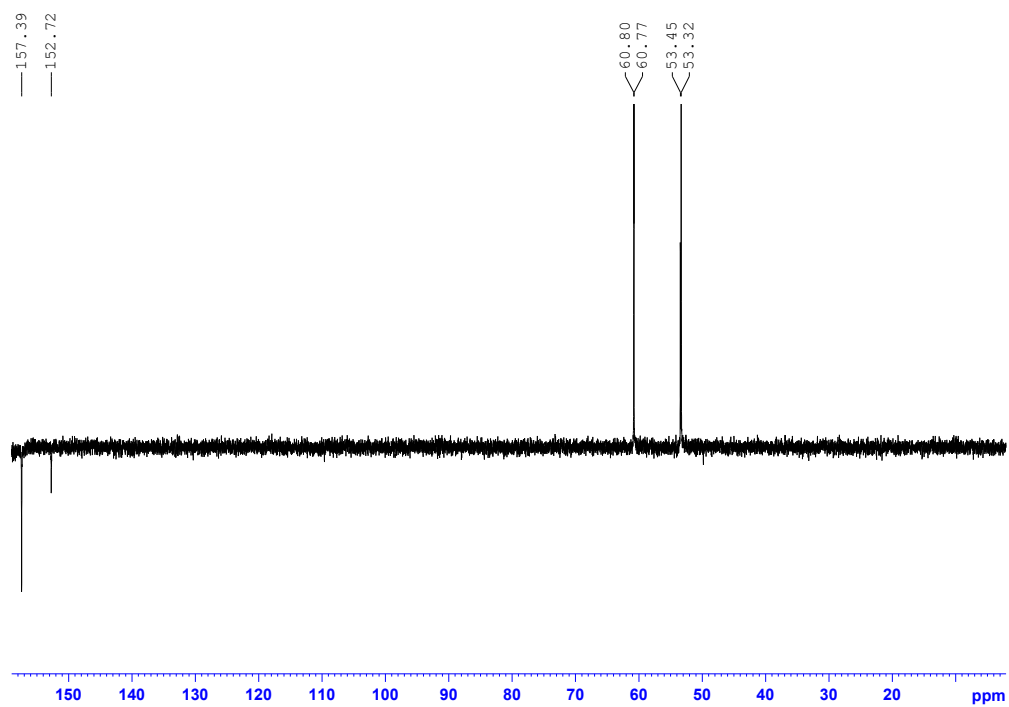

Supplement: d0ob01950j1.pdf [file d0ob01950j1.pdf]
